# Supplementary material
Source: PubMed Central journal article supplement (PMC8865217)

# **Rufomycins or Ilamycins: Naming Clarifications and Definitive Structural Assignments**

Bin Zhou, Prabhakar S. Achanta, Gauri Shetye, Shao-Nong Chen, Hyun Lee, Ying-Yu Jin, Jinhua Cheng, Mi-Jin Lee, Joo-Won Suh, Sanghyun Cho, Scott G. Franzblau, Guido F. Pauli, James B. McAlpine

## **■ SUPPORTING INFORMATION**

## Table of Contents

|                                                                                                         |    |
|---------------------------------------------------------------------------------------------------------|----|
| <b>Chart S1.</b> Clarification of rufomycin 4 and its related three diastereomers (rufomycins 5–7)..... | 4  |
| <b>Figure S1.</b> <sup>1</sup> H NMR spectrum of rufomycin 4 in CD <sub>3</sub> OD at 600 MHz.....      | 5  |
| <b>Figure S2.</b> <sup>13</sup> C NMR spectrum of rufomycin 4 in CD <sub>3</sub> OD.....                | 5  |
| <b>Figure S3.</b> TOCSY spectrum of rufomycin 4 in CD <sub>3</sub> OD.....                              | 6  |
| <b>Figure S4.</b> HSQC spectrum of rufomycin 4 in CD <sub>3</sub> OD.....                               | 6  |
| <b>Figure S5.</b> HMBC spectrum of rufomycin 4 in CD <sub>3</sub> OD at (600 MHz, <sup>1</sup> H).....  | 7  |
| <b>Figure S6.</b> ROESY spectrum of rufomycin 4 in CD <sub>3</sub> OD.....                              | 7  |
| <b>Figure S7.</b> HRMS (ESI) spectrum of rufomycin 4.....                                               | 8  |
| <b>Figure S8.</b> <sup>1</sup> H NMR spectrum of rufomycin 5 in CD <sub>3</sub> OD at 600 MHz.....      | 8  |
| <b>Figure S9.</b> <sup>13</sup> C NMR spectrum of rufomycin 5 in CD <sub>3</sub> OD at 150 MHz.....     | 9  |
| <b>Figure S10.</b> TOCSY spectrum of rufomycin 5 in CD <sub>3</sub> OD (400 MHz).....                   | 9  |
| <b>Figure S11.</b> HSQC spectrum of rufomycin 5 in CD <sub>3</sub> OD.....                              | 10 |
| <b>Figure S12.</b> HMBC spectrum of rufomycin 5 in CD <sub>3</sub> OD (400 MHz, <sup>1</sup> H).....    | 10 |
| <b>Figure S13.</b> ROESY spectrum of rufomycin 5 in CD <sub>3</sub> OD.....                             | 11 |
| <b>Figure S14.</b> HRMS (ESI) spectrum of rufomycin 5.....                                              | 11 |
| <b>Figure S15.</b> <sup>1</sup> H NMR spectrum of rufomycin 6 in CD <sub>3</sub> OD at 600 MHz.....     | 12 |
| <b>Figure S16.</b> <sup>13</sup> C NMR spectrum of rufomycin 6 in CD <sub>3</sub> OD at 150 MHz.....    | 12 |
| <b>Figure S17.</b> TOCSY spectrum of rufomycin 6 in CD <sub>3</sub> OD.....                             | 13 |
| <b>Figure S18.</b> HSQC spectrum of rufomycin 6 in CD <sub>3</sub> OD.....                              | 13 |
| <b>Figure S19.</b> HMBC spectrum of rufomycin 6 in CD <sub>3</sub> OD.....                              | 14 |
| <b>Figure S20.</b> ROESY spectrum of rufomycin 6 in CD <sub>3</sub> OD.....                             | 14 |
| <b>Figure S21.</b> HRMS (ESI) spectrum of rufomycin 6.....                                              | 15 |
| <b>Figure S22.</b> <sup>1</sup> H NMR spectrum of rufomycin 7 in CD <sub>3</sub> OD at 600 MHz.....     | 15 |
| <b>Figure S22-1.</b> Selected <sup>1</sup> H NMR peak of rufomycin 7.....                               | 15 |
| <b>Figure S23.</b> <sup>13</sup> C NMR spectrum of rufomycin 7 in CD <sub>3</sub> OD at 150 MHz.....    | 16 |
| <b>Figure S24.</b> TOCSY spectrum of rufomycin 7 in CD <sub>3</sub> OD (400 MHz).....                   | 16 |
| <b>Figure S25.</b> HSQC spectrum of rufomycin 7 in CD <sub>3</sub> OD (400 MHz, <sup>1</sup> H).....    | 17 |
| <b>Figure S26.</b> HMBC spectrum of rufomycin 7 in CD <sub>3</sub> OD (400 MHz, <sup>1</sup> H).....    | 17 |
| <b>Figure S27.</b> ROESY spectrum of rufomycin 7 in CD <sub>3</sub> OD.....                             | 18 |
| <b>Figure S28.</b> HRMS (ESI) spectrum of rufomycin 7.....                                              | 18 |
| <b>Figure S29.</b> <sup>1</sup> H NMR spectrum of rufomycinSS 1 in CD <sub>3</sub> OD at 600 MHz.....   | 19 |
| <b>Figure S30.</b> <sup>13</sup> C NMR spectrum of rufomycinSS 1 in CD <sub>3</sub> OD at 150 MHz.....  | 19 |
| <b>Figure S31.</b> TOCSY spectrum of rufomycinSS 1 in CD <sub>3</sub> OD.....                           | 20 |
| <b>Figure S32.</b> HSQC spectrum of rufomycinSS 1 in CD <sub>3</sub> OD.....                            | 20 |
| <b>Figure S33.</b> HMBC spectrum of rufomycinSS 1 in CD <sub>3</sub> OD.....                            | 21 |
| <b>Figure S34.</b> ROESY spectrum of rufomycinSS 1 in CD <sub>3</sub> OD.....                           | 21 |
| <b>Figure S35.</b> HRMS (ESI) spectrum of rufomycinSS 1.....                                            | 22 |
| <b>Figure S36.</b> <sup>1</sup> H NMR spectrum of rufomycinSS 2 in CD <sub>3</sub> OD at 600 MHz.....   | 22 |
| <b>Figure S37.</b> <sup>13</sup> C NMR spectrum of rufomycinSS 2 in CD <sub>3</sub> OD at 150 MHz.....  | 23 |

|                                                                                                              |    |
|--------------------------------------------------------------------------------------------------------------|----|
| <b>Figure S38.</b> TOCSY NMR spectrum of rufomycinSS 2 in CD <sub>3</sub> OD .....                           | 23 |
| <b>Figure S39.</b> HSQC spectrum of rufomycinSS 2 in CD <sub>3</sub> OD .....                                | 24 |
| <b>Figure S40.</b> HMBC spectrum of rufomycinSS 2 in CD <sub>3</sub> OD .....                                | 24 |
| <b>Figure S41.</b> ROESY spectrum of rufomycinSS 2 in CD <sub>3</sub> OD .....                               | 25 |
| <b>Figure S42.</b> HRMS (ESI) spectrum of rufomycinSS 2 .....                                                | 25 |
| <b>Figure S43.</b> <sup>1</sup> H NMR spectrum of rufomycinSS 3 in CD <sub>3</sub> OD at 600 MHz.....        | 26 |
| <b>Figure S44.</b> <sup>13</sup> C NMR spectrum of rufomycinSS 3 in CD <sub>3</sub> OD at 150 MHz.....       | 26 |
| <b>Figure S45.</b> TOCSY NMR spectrum of rufomycinSS 3 in CD <sub>3</sub> OD .....                           | 27 |
| <b>Figure S46.</b> HSQC spectrum of rufomycinSS 3 in CD <sub>3</sub> OD .....                                | 27 |
| <b>Figure S47.</b> HMBC spectrum of rufomycinSS 3 in CD <sub>3</sub> OD .....                                | 28 |
| <b>Figure S48.</b> HRMS (ESI) spectrum of rufomycinSS 3 .....                                                | 28 |
| <b>Figure S49.</b> ROESY spectrum of rufomycinSS 3 in CD <sub>3</sub> OD .....                               | 29 |
| <b>Figure S50.</b> Selected HSQC data of rufomycins 6 and 7.....                                             | 29 |
| <b>Figure S51.</b> <sup>1</sup> H NMR spectrum of rufomycin 21 in CD <sub>3</sub> OD at 400 MHz .....        | 30 |
| <b>Figure S52.</b> <sup>13</sup> C NMR spectrum of rufomycin 21 in CD <sub>3</sub> OD at 100 MHz .....       | 30 |
| <b>Figure S53.</b> TOCSY NMR spectrum of rufomycin 21 in CD <sub>3</sub> OD.....                             | 31 |
| <b>Figure S54.</b> HSQC spectrum of rufomycin 21 in CD <sub>3</sub> OD.....                                  | 31 |
| <b>Figure S55.</b> HMBC spectrum of rufomycin 21 in CD <sub>3</sub> OD.....                                  | 32 |
| <b>Figure S56.</b> HRMS (ESI) spectrum of rufomycin 21 .....                                                 | 32 |
| <b>Figure S57.</b> NOESY spectrum of rufomycin 21 in CD <sub>3</sub> OD .....                                | 33 |
| <b>Chart S2.</b> Structure verification of ilamycin E1 and E2 .....                                          | 34 |
| <b>Figure S58.</b> RufomycinSS 2 and 3 showed distinct conformers based on the <sup>13</sup> C NMR data..... | 35 |

**Chart S1.** Clarification of rufomycin 4 and its related three diastereomers (rufomycins 5–7)

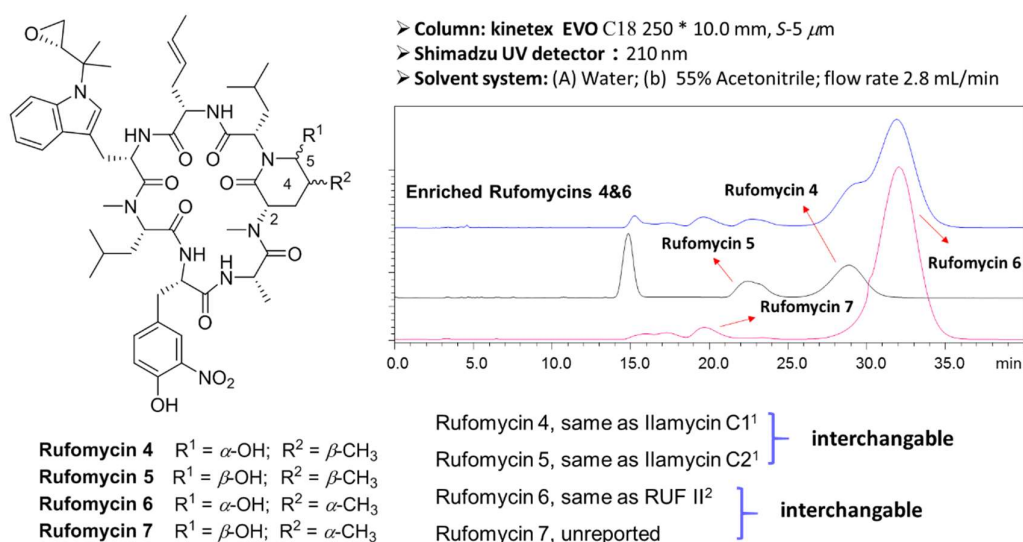

## References

- [1] Ma, J.; Huang, H.; Xie, Y.; Liu, Z.; Zhao, J.; Zhang, C.; Jia, Y.; Zhang, Y.; Zhang, H.; Zhang, T.; Ju, J. Biosynthesis of ilamycins featuring unusual building blocks and engineered production of enhanced anti-tuberculosis agents. *Nature communication* **2017**, *8*, 1–10.
- [2] Choules, M. P.; Wolf, N. M.; Lee, H.; Anderson, J. R.; Grzelak, E. M.; Wang, Y.; Ma, R.; Gao, W.; McAlpine, J. B.; Jin, Y. Y.; Cheng, J.; Lee, H.; Suh, J. W.; Duc, N. M.; Paik, S.; Choe, J. H.; Jo, E. K.; Chang, C. L.; Lee, J. S.; Jaki, B. U.; Pauli, G. F.; Franzblau, S. G.; Cho, S. rufomycin Targets ClpC1 Proteolysis in Mycobacterium tuberculosis and M. abscessus. *Antimicrob Agents Chemother* **2019**, *63*, e02204–e02218.

**Figure S1.**  $^1\text{H}$  NMR spectrum of rufomycin 4 in  $\text{CD}_3\text{OD}$  at 600 MHz

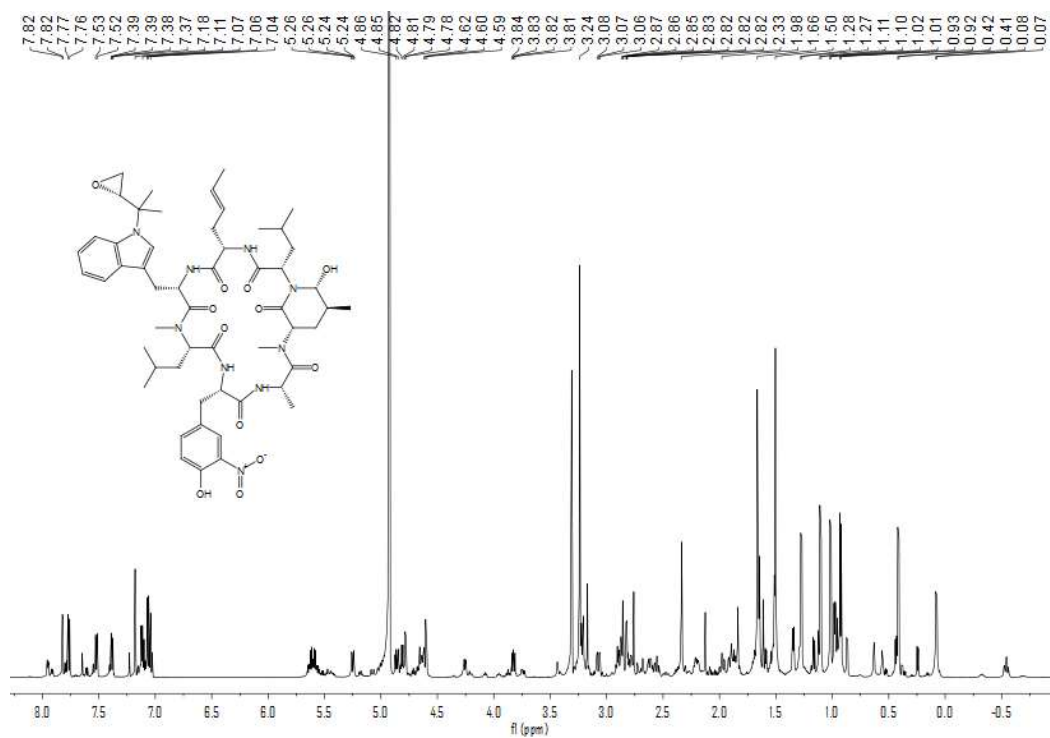

**Figure S2.**  $^{13}\text{C}$  NMR spectrum of rufomycin 4 in  $\text{CD}_3\text{OD}$  at 150 MHz

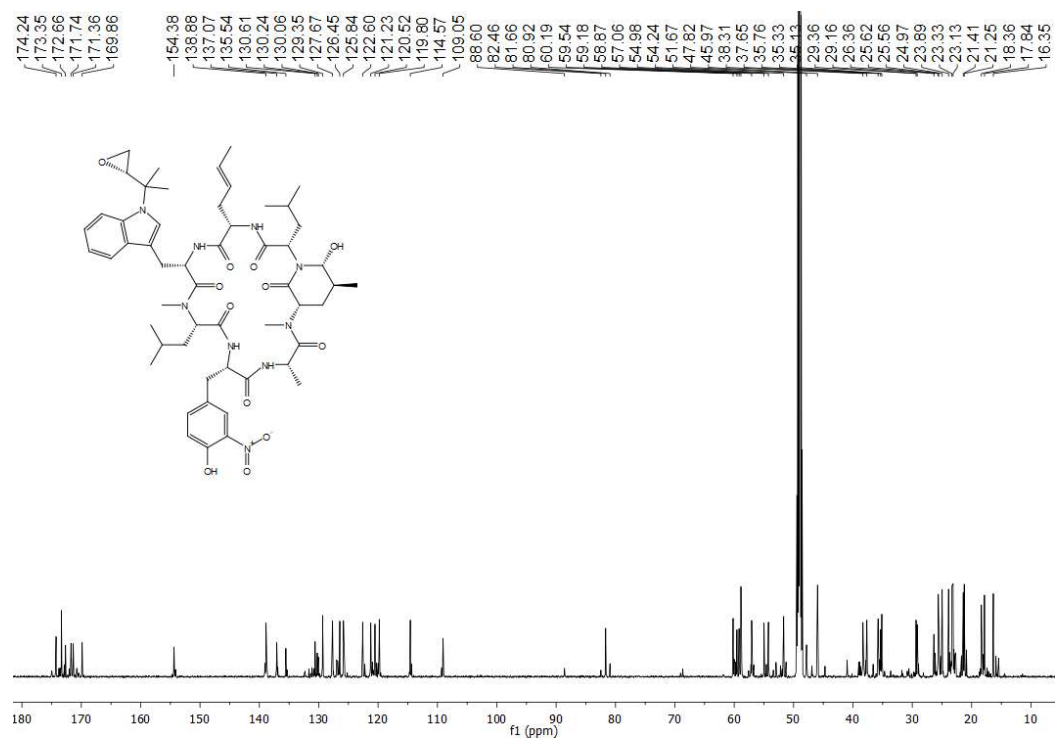

**Figure S3.** TOCSY spectrum of rufomycin 4 in CD<sub>3</sub>OD

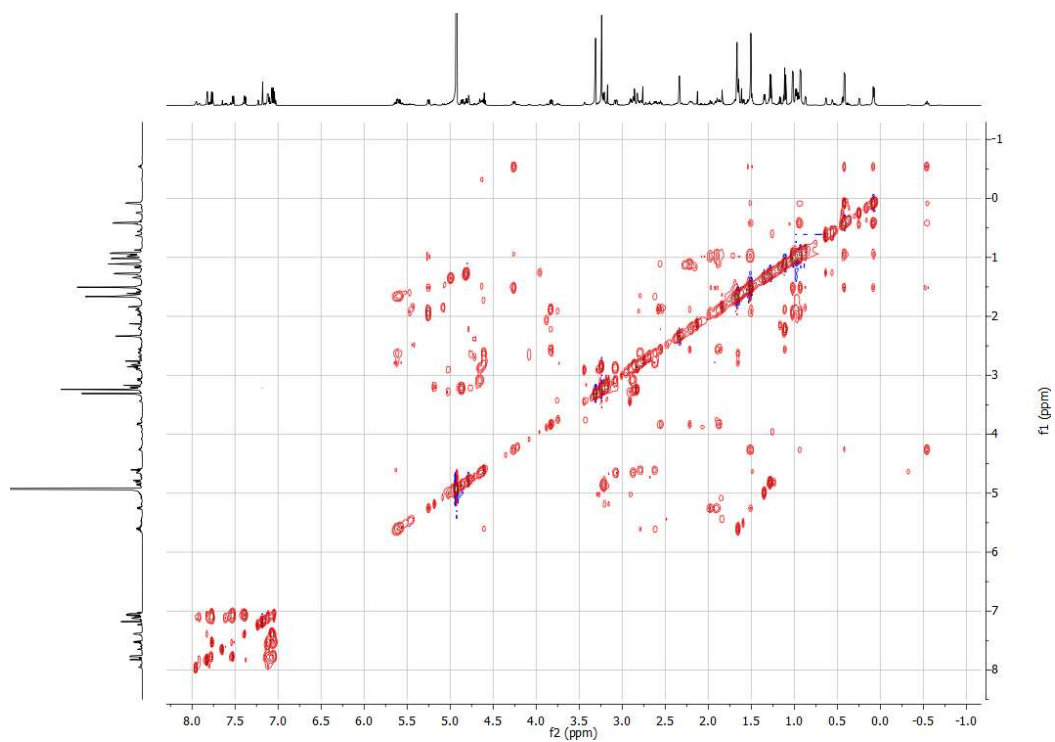

**Figure S4.** HSQC spectrum of rufomycin 4 in CD<sub>3</sub>OD

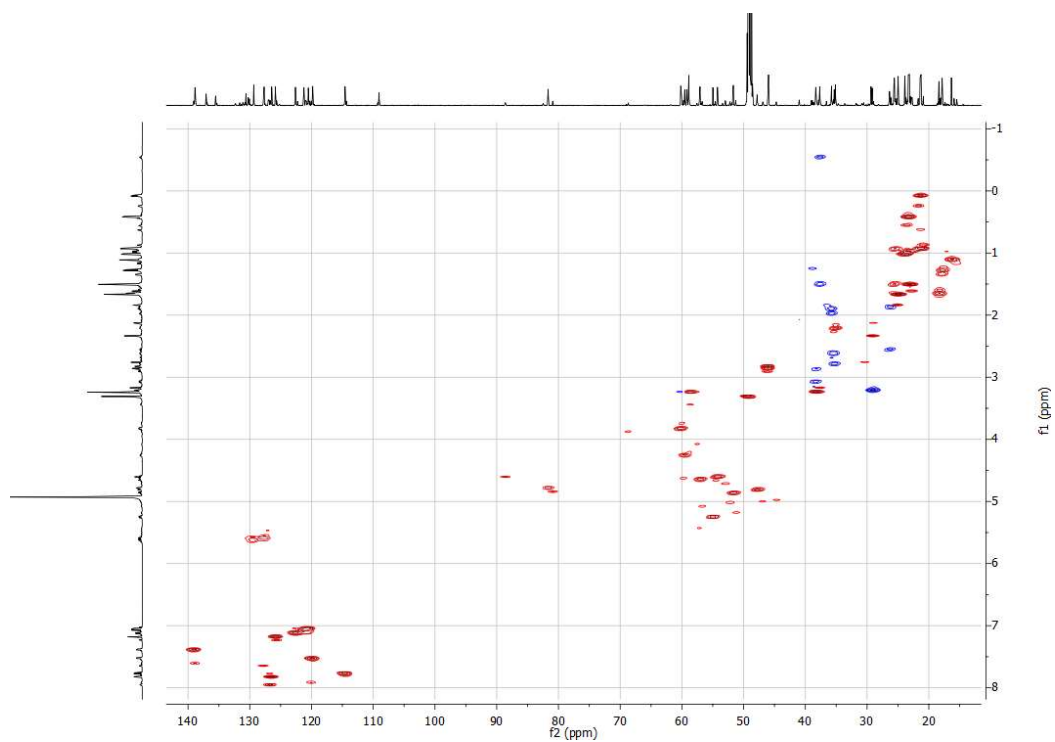

**Figure S5.** HMBC spectrum of rufomycin 4 in CD<sub>3</sub>OD at (600 MHz, <sup>1</sup>H)

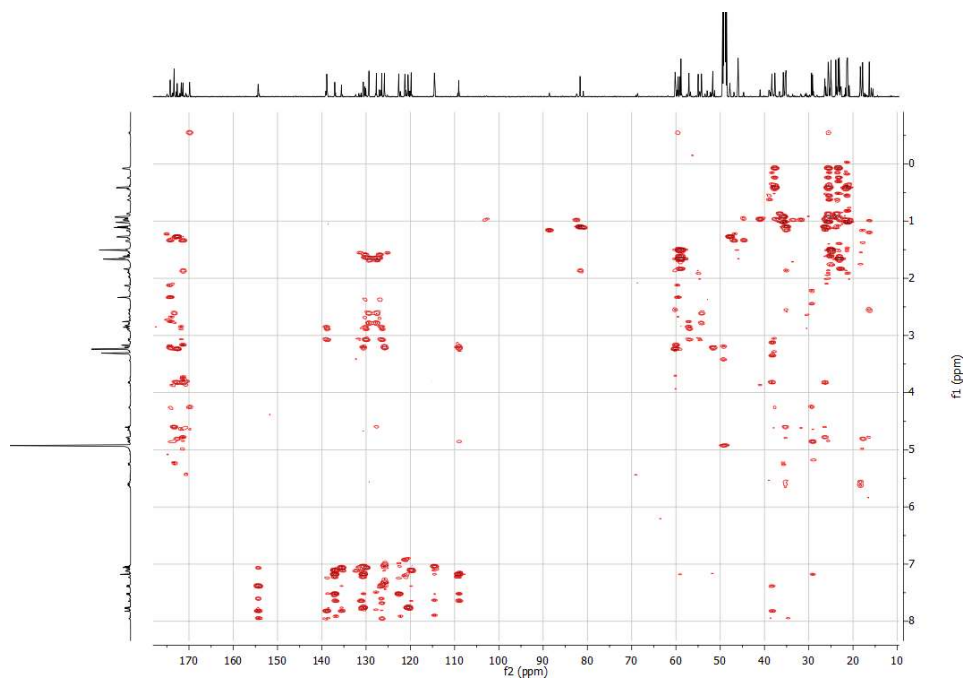

**Figure S6.** ROESY spectrum of rufomycin 4 in CD<sub>3</sub>OD

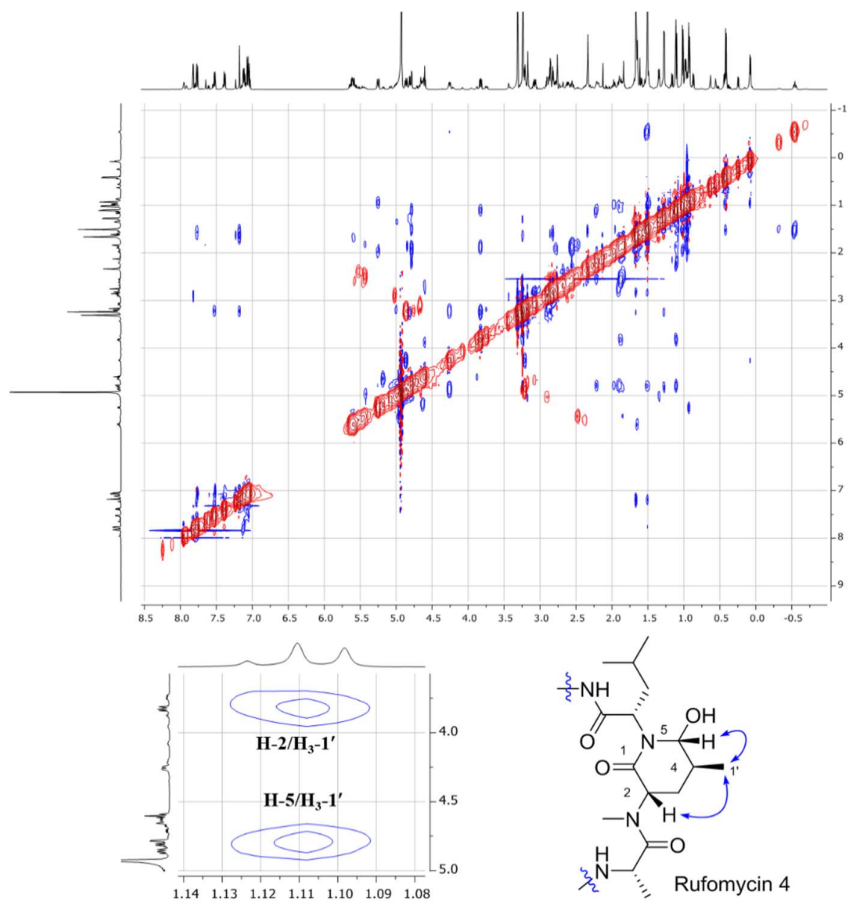

**Figure S7.** HRMS (ESI) spectrum of rufomycin 4

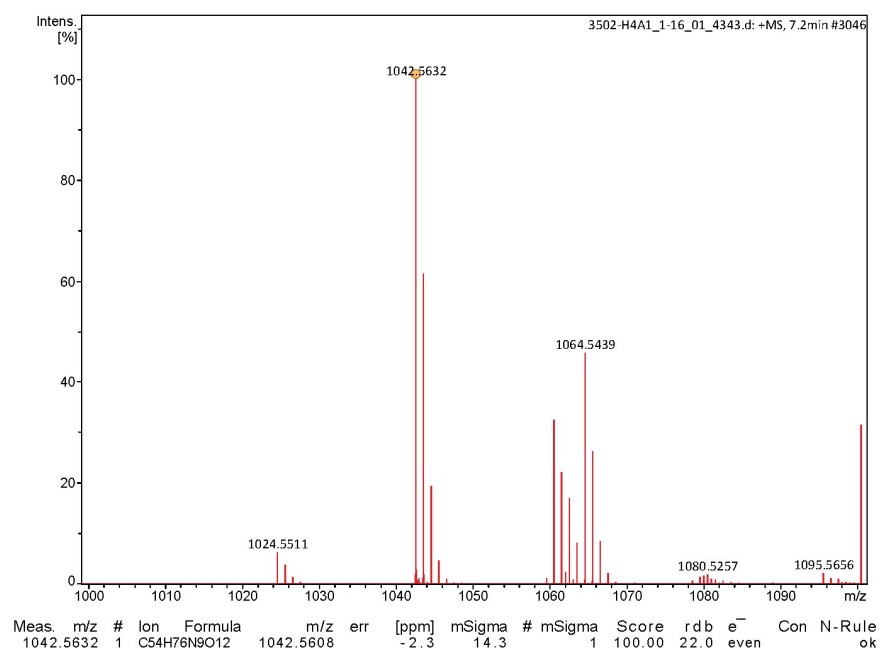

**Figure S8.** <sup>1</sup>H NMR spectrum of rufomycin 5 in CD<sub>3</sub>OD at 600 MHz

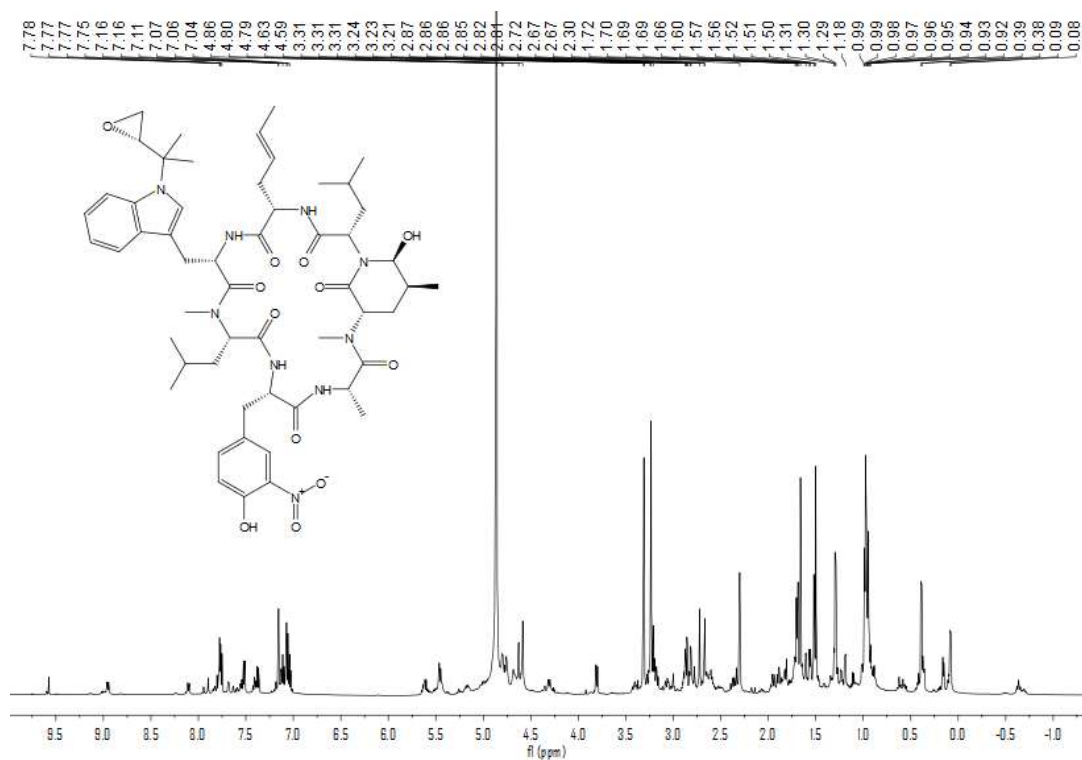



**Figure S9.**  $^{13}\text{C}$  NMR spectrum of rufomycin 5 in  $\text{CD}_3\text{OD}$  at 150 MHz

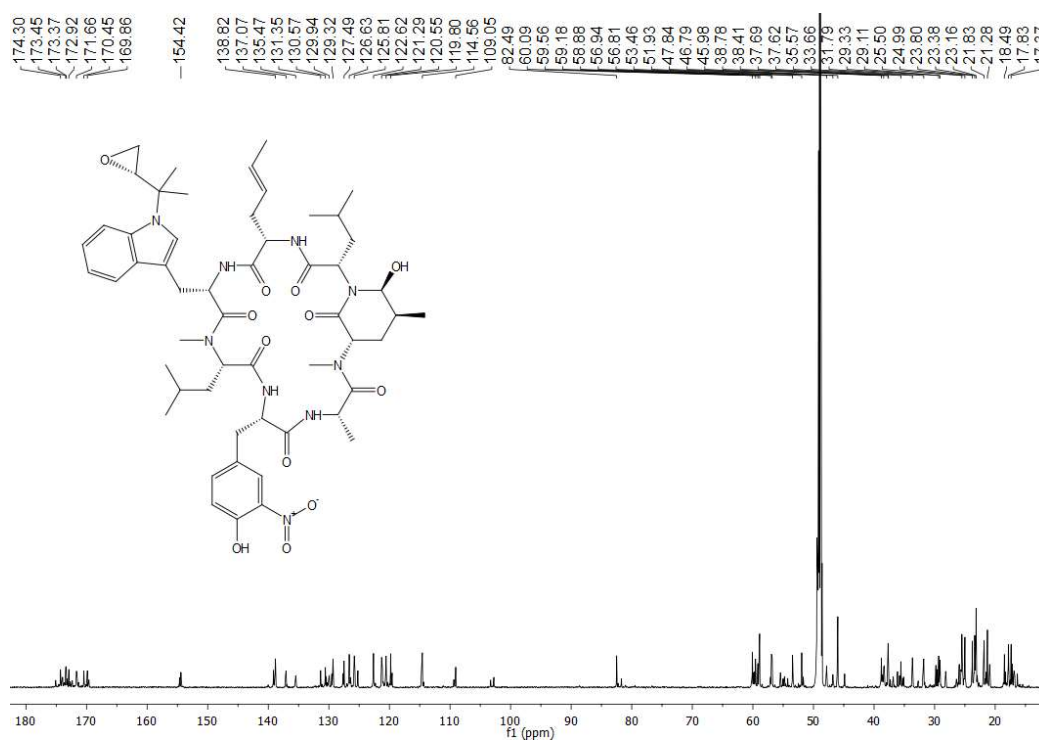

**Figure S10.** TOCSY spectrum of rufomycin 5 in  $\text{CD}_3\text{OD}$  (400 MHz)

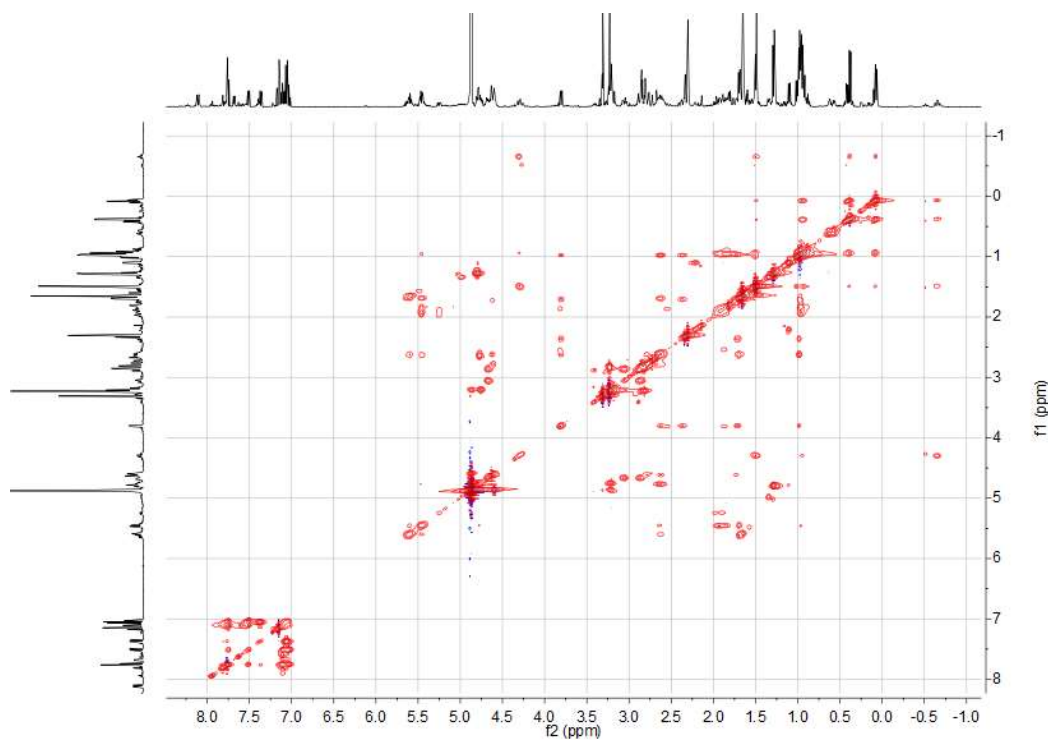

**Figure S11.** HSQC spectrum of rufomyacin 5 in CD<sub>3</sub>OD

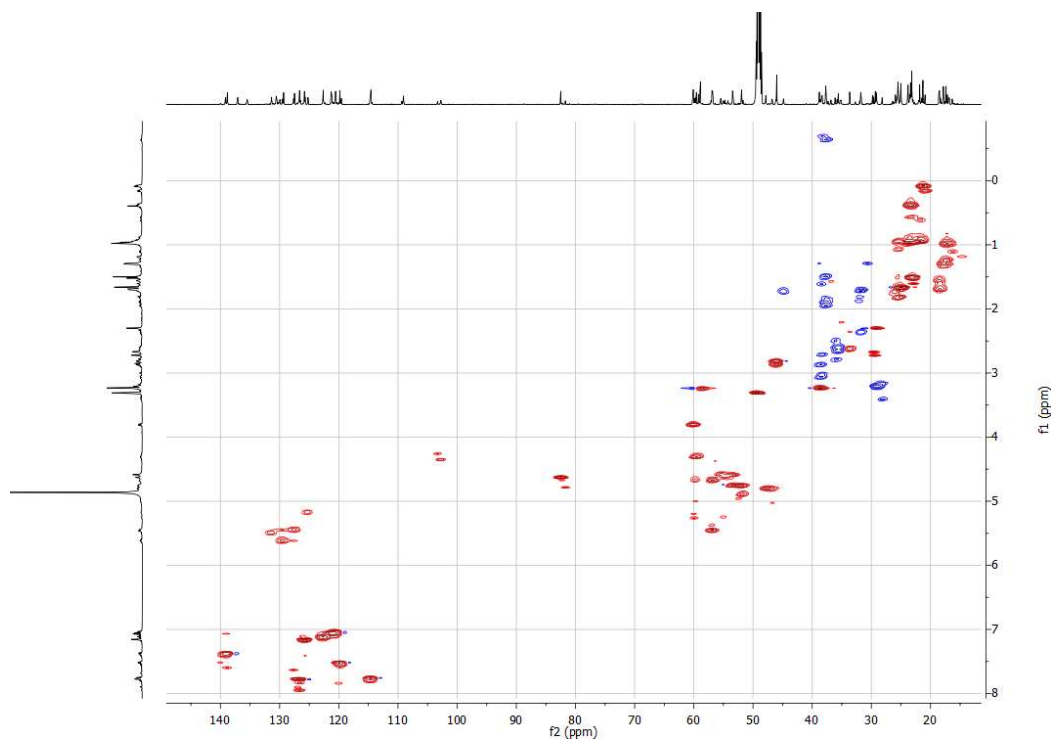

**Figure S12.** HMBC spectrum of rufomyacin 5 in CD<sub>3</sub>OD (400 MHz, <sup>1</sup>H)

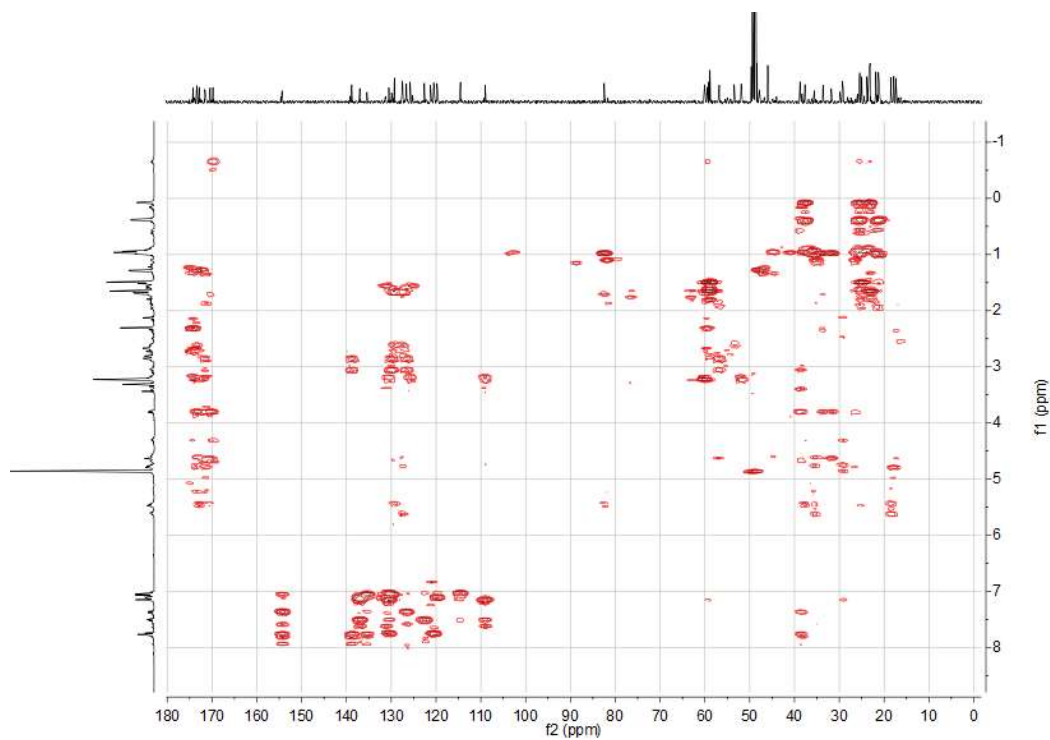

**Figure S13.** ROESY spectrum of rufomycin 5 in CD<sub>3</sub>OD

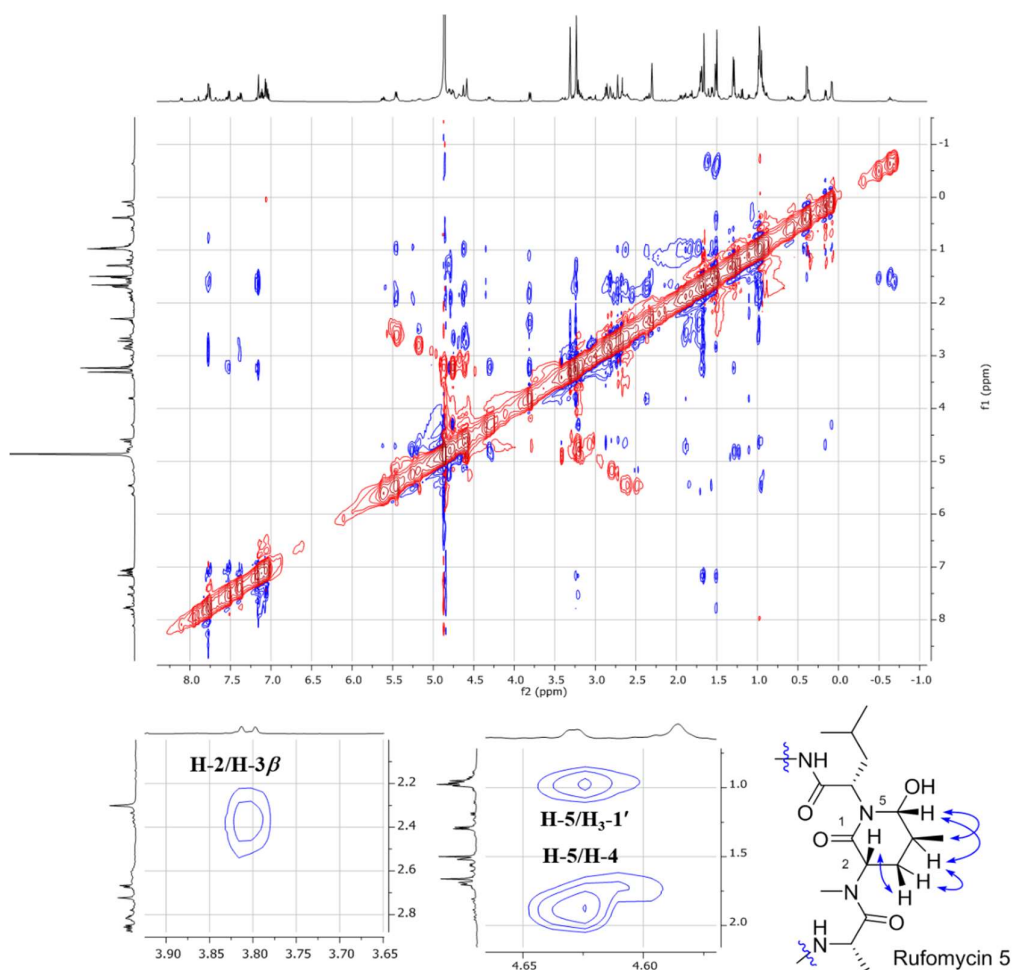

**Figure S14.** HRMS (ESI) spectrum of rufomycin 5

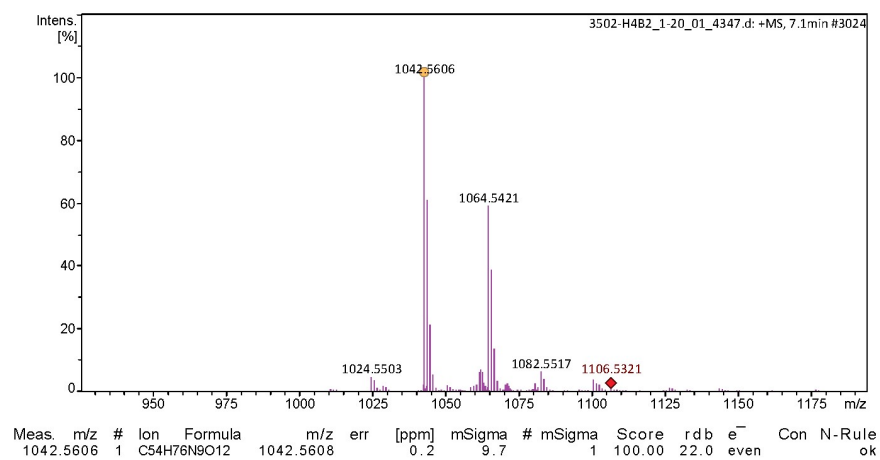

**Figure S15.**  $^1\text{H}$  NMR spectrum of rufomycin 6 in  $\text{CD}_3\text{OD}$  at 600 MHz

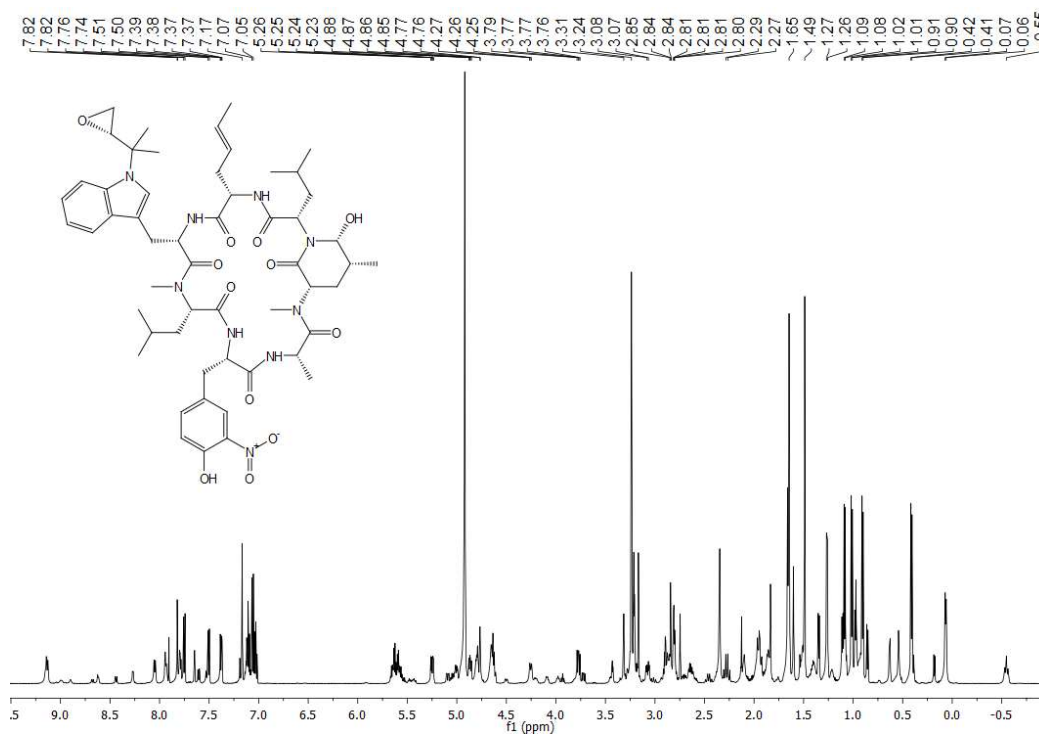

**Figure S16.**  $^{13}\text{C}$  NMR spectrum of rufomycin 6 in  $\text{CD}_3\text{OD}$  at 150 MHz

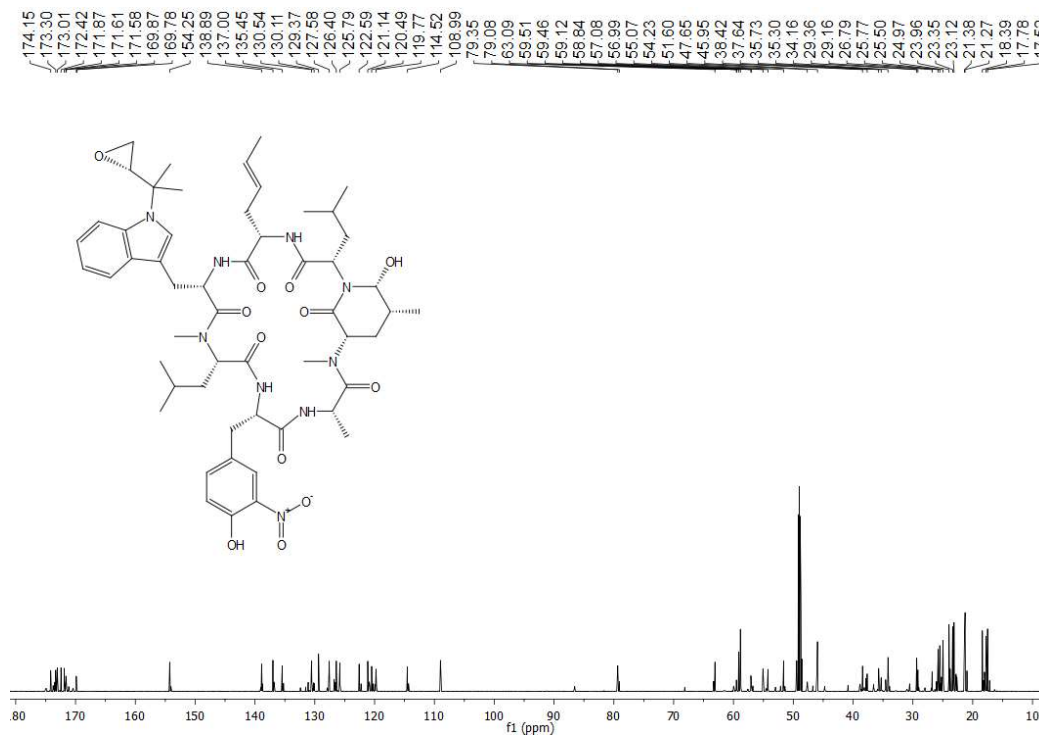

**Figure S17.** TOCSY spectrum of rufomycin 6 in CD<sub>3</sub>OD

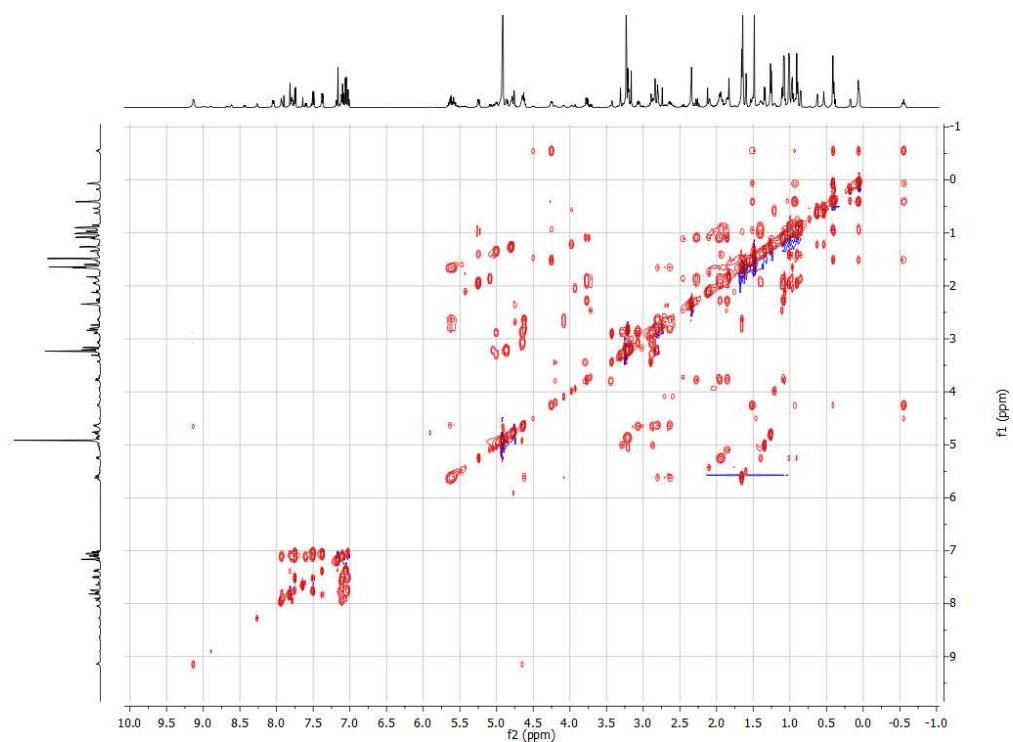

**Figure S18.** HSQC spectrum of rufomycin 6 in CD<sub>3</sub>OD

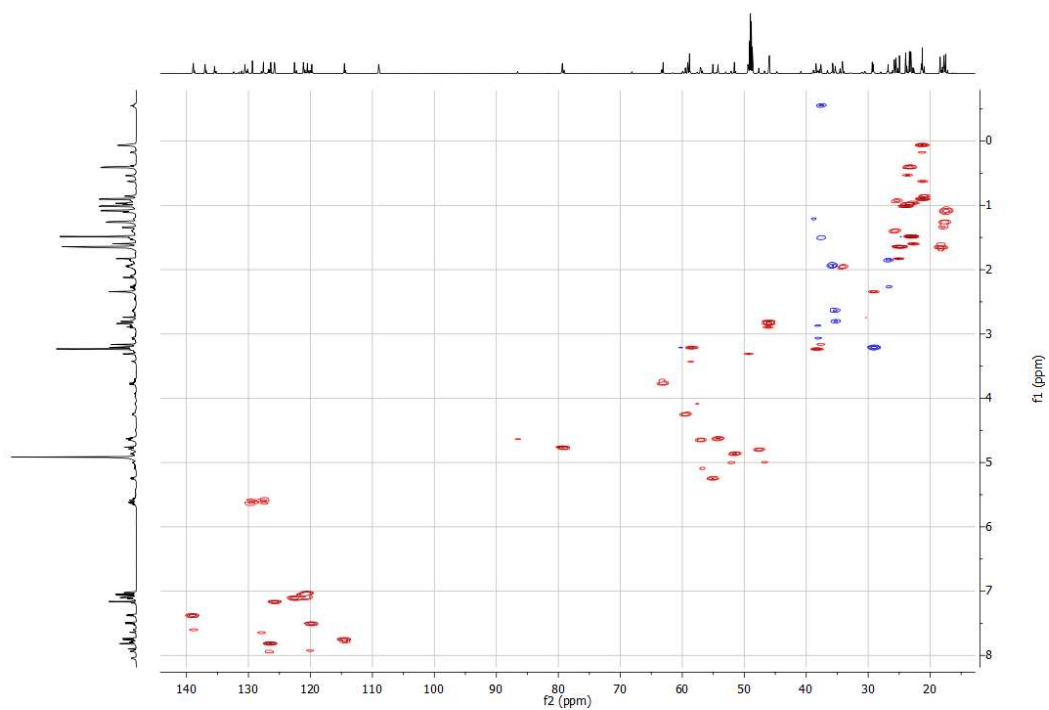

Figure S19. HMBC spectrum of rufomycin 6 in CD<sub>3</sub>OD

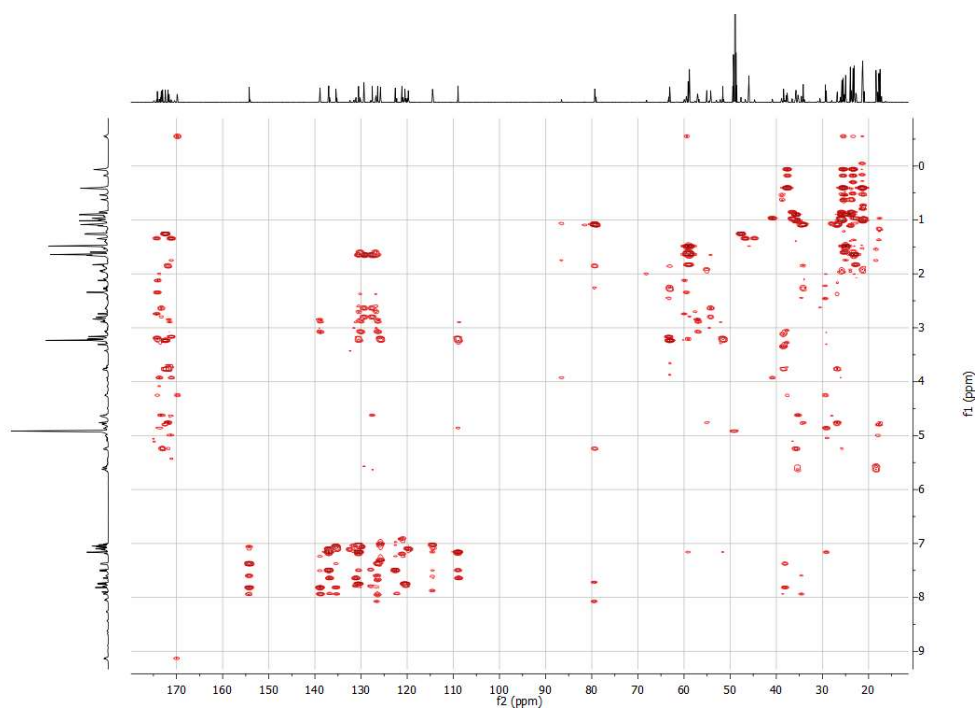

Figure S20. ROESY spectrum of rufomycin 6 in CD<sub>3</sub>OD

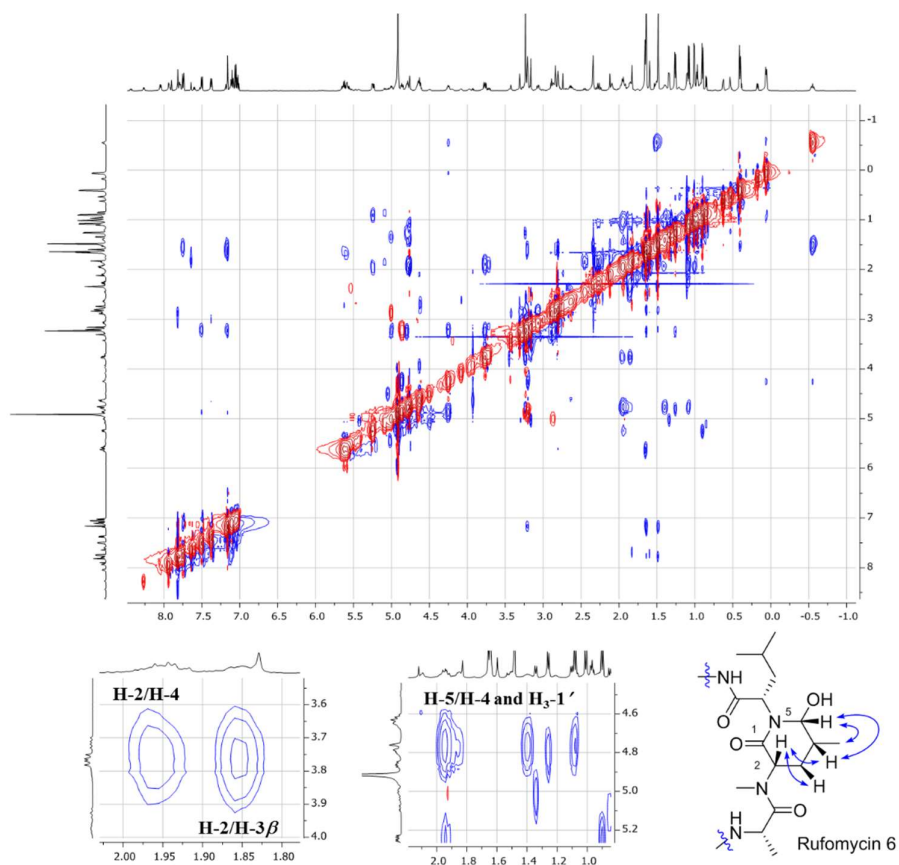

**Figure S21.** HRMS (ESI) spectrum of rufomycin 6

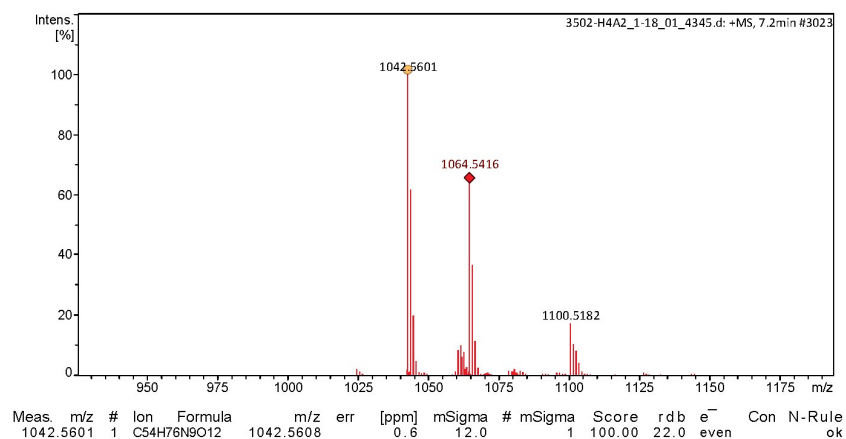

**Figure S22.** <sup>1</sup>H NMR spectrum of rufomycin 7 in CD<sub>3</sub>OD at 600 MHz

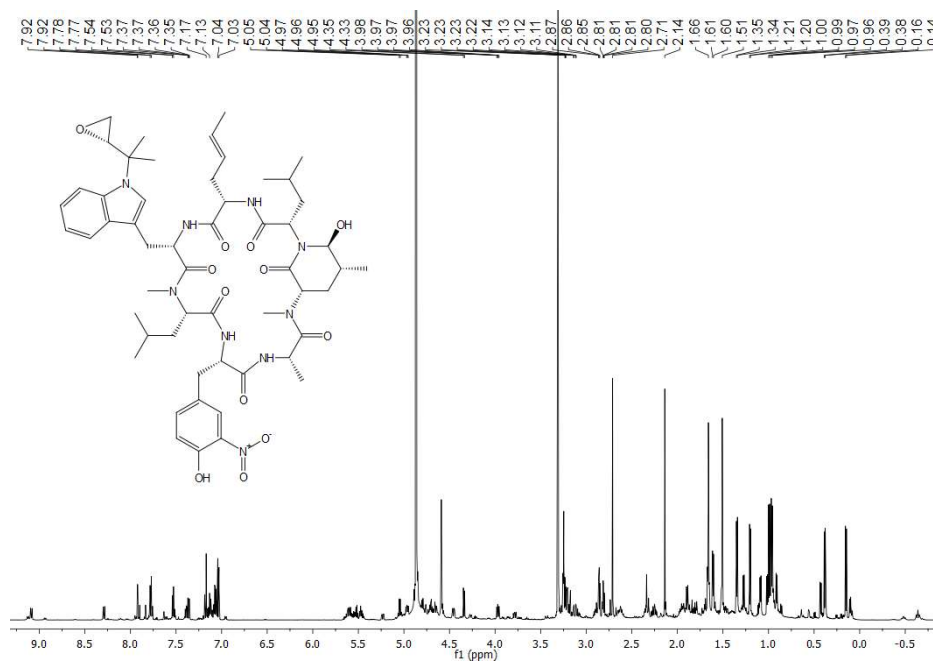

**Figure S22-1.** Selected <sup>1</sup>H NMR peak of rufomycin 7

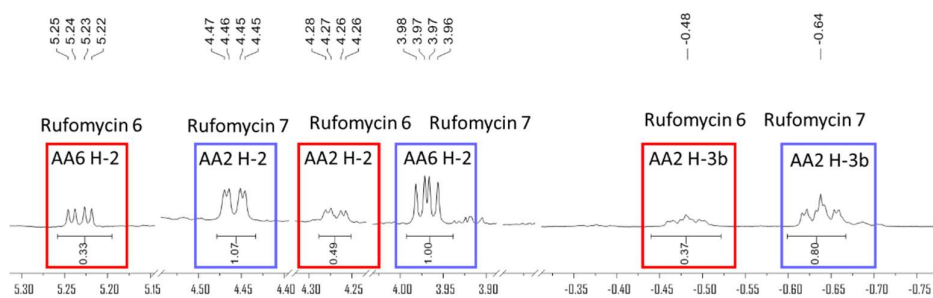

**Figure S23.**  $^{13}\text{C}$  NMR spectrum of rufomycin 7 in  $\text{CD}_3\text{OD}$  at 150 MHz

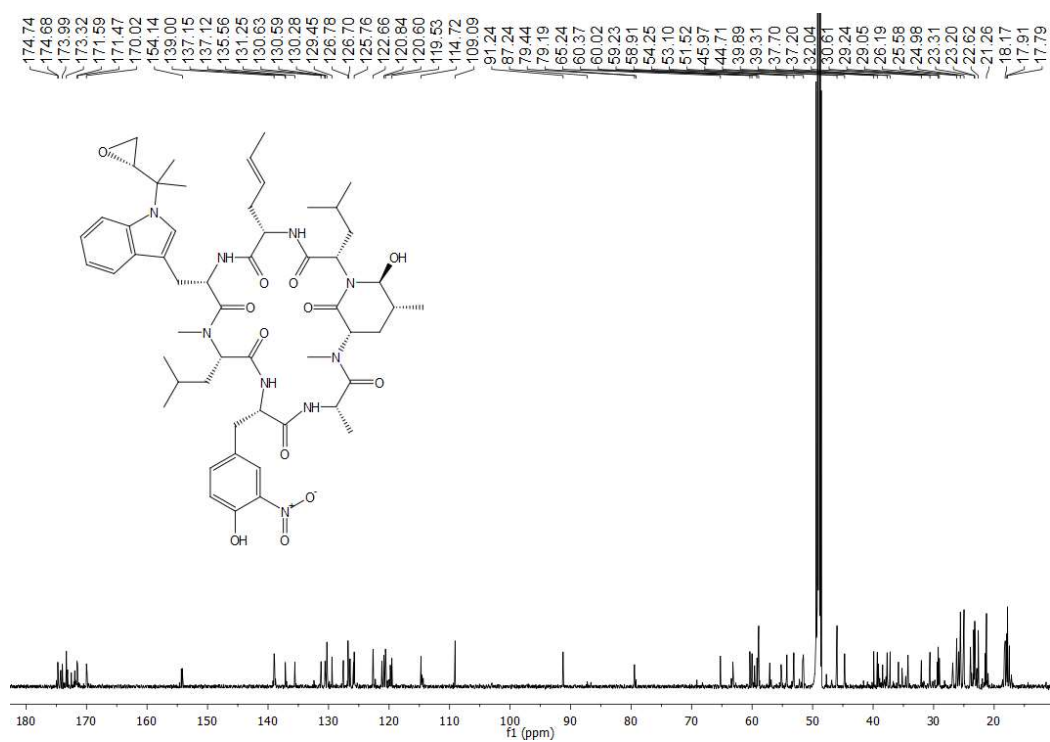

**Figure S24.** TOCSY spectrum of rufomycin 7 in  $\text{CD}_3\text{OD}$  (400 MHz)

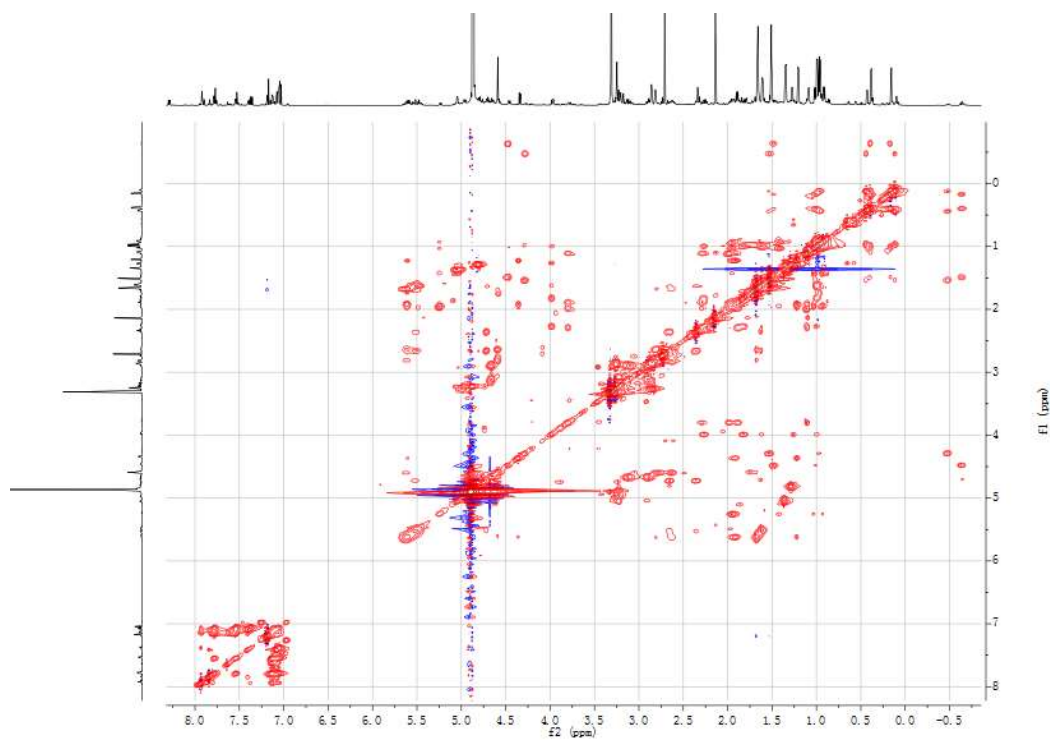



**Figure S25.** HSQC spectrum of rufomycin 7 in CD<sub>3</sub>OD (400 MHz, <sup>1</sup>H)

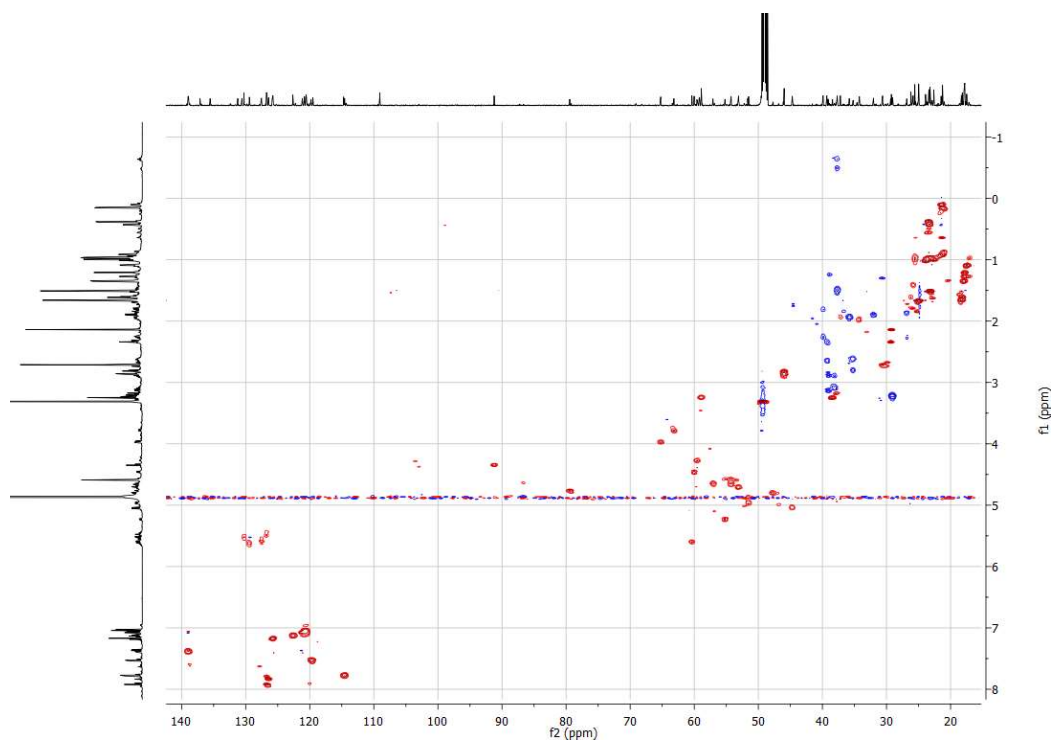

**Figure S26.** HMBC spectrum of rufomycin 7 in CD<sub>3</sub>OD (400 MHz, <sup>1</sup>H)

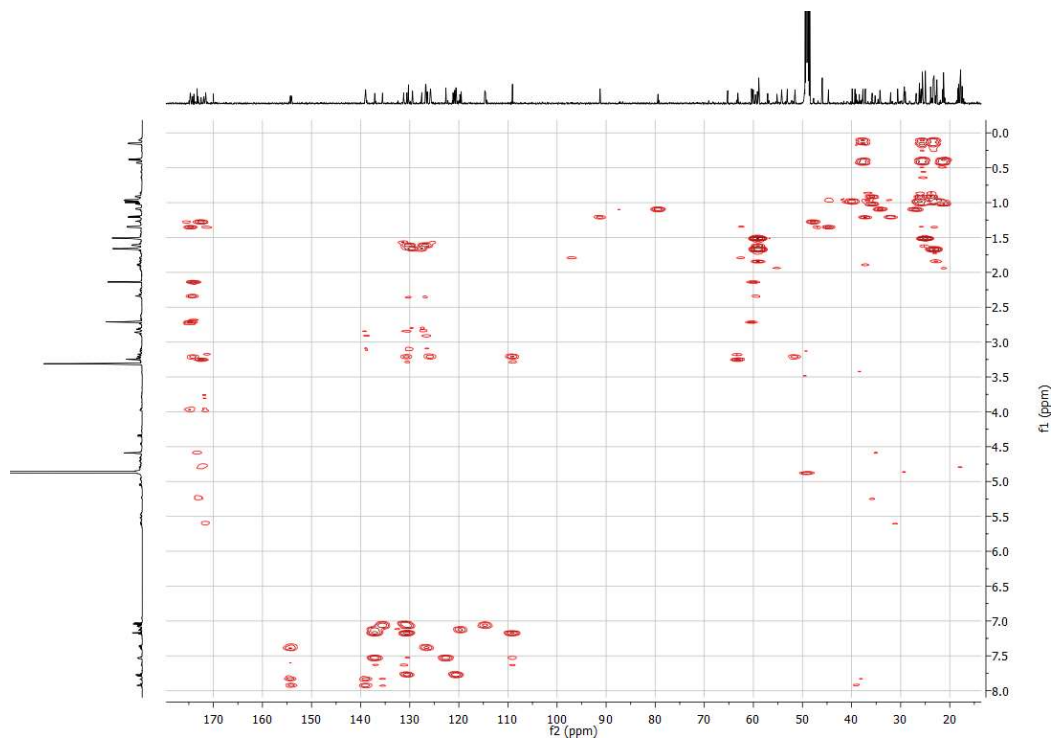

Figure S27. ROESY spectrum of rufomycin 7 in CD<sub>3</sub>OD

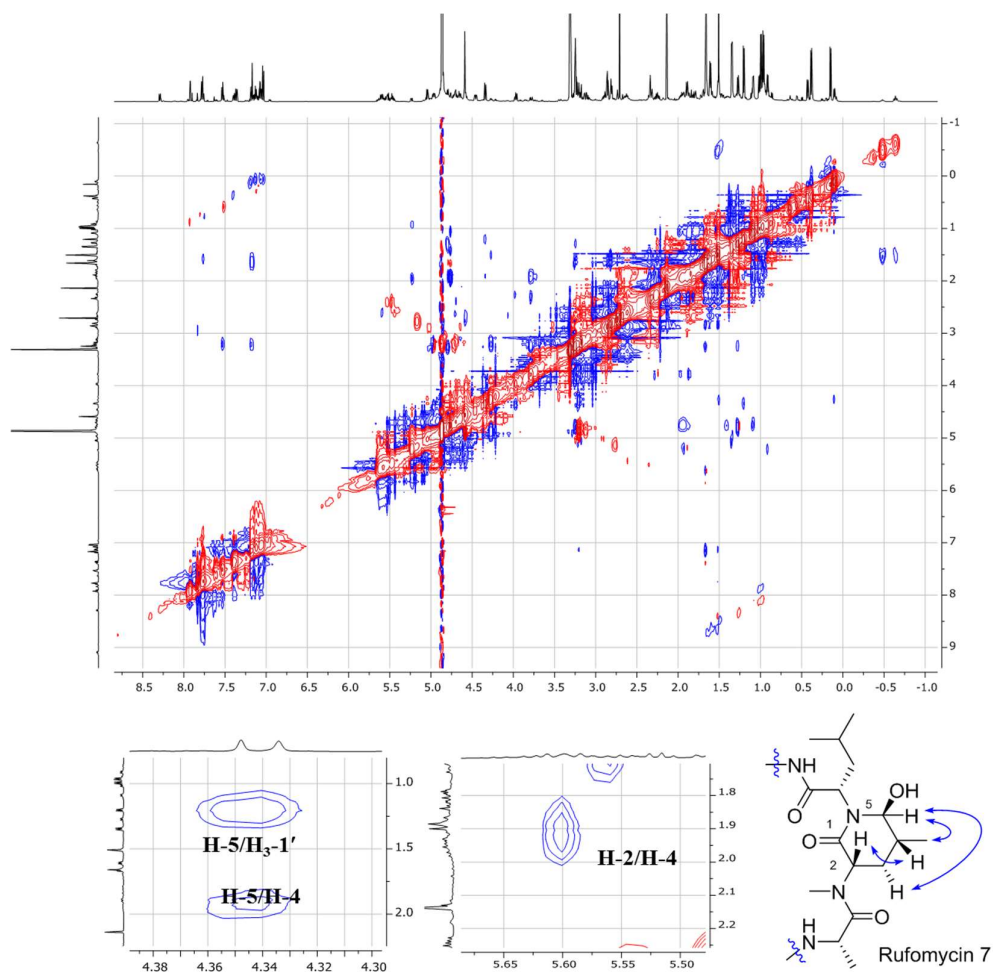

Figure S28. HRMS (ESI) spectrum of rufomycin 7

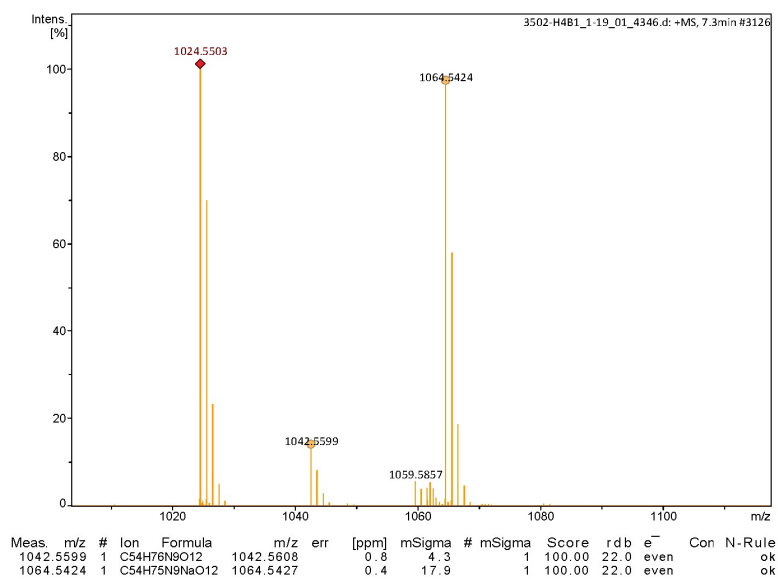

**Figure S29.**  $^1\text{H}$  NMR spectrum of rufomycinSS 1 in  $\text{CD}_3\text{OD}$  at 600 MHz

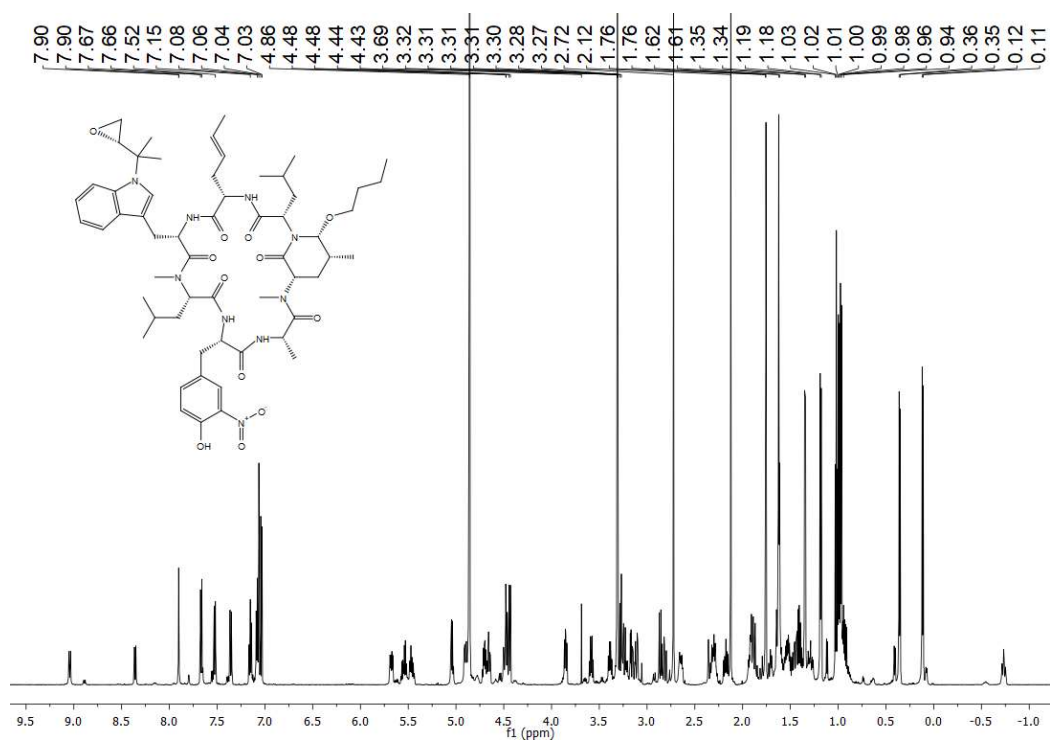

**Figure S30.**  $^{13}\text{C}$  NMR spectrum of rufomycinSS 1 in  $\text{CD}_3\text{OD}$  at 150 MHz

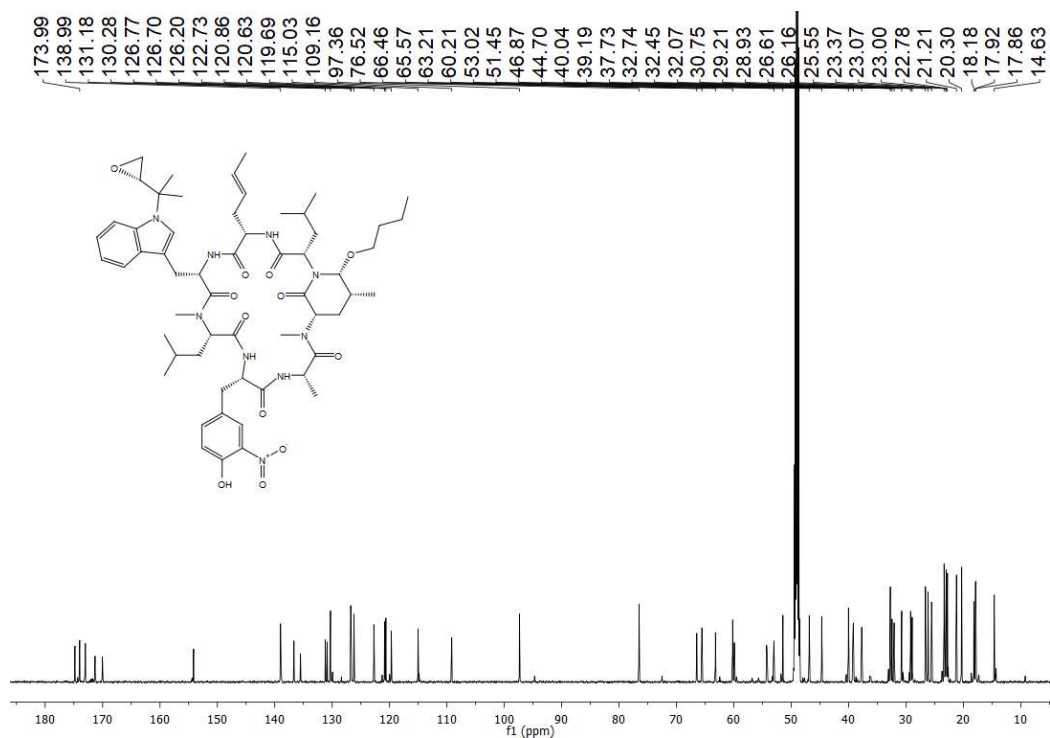

**Figure S31.** TOCSY spectrum of rufomycinSS 1 in CD<sub>3</sub>OD

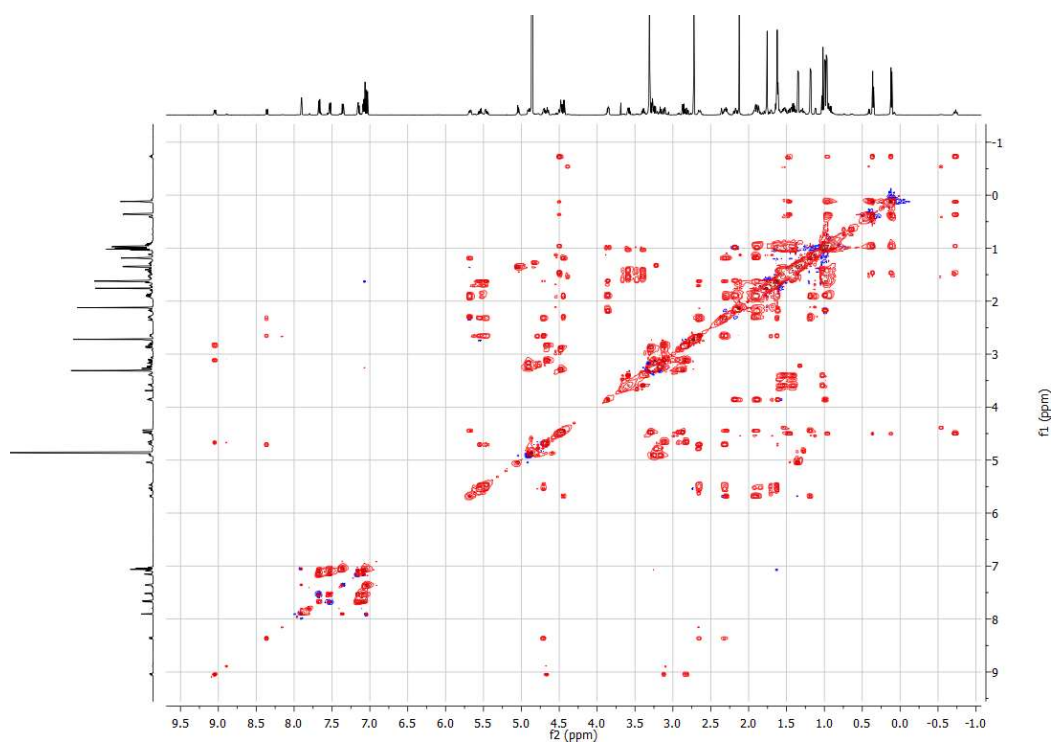

**Figure S32.** HSQC spectrum of rufomycinSS 1 in CD<sub>3</sub>OD

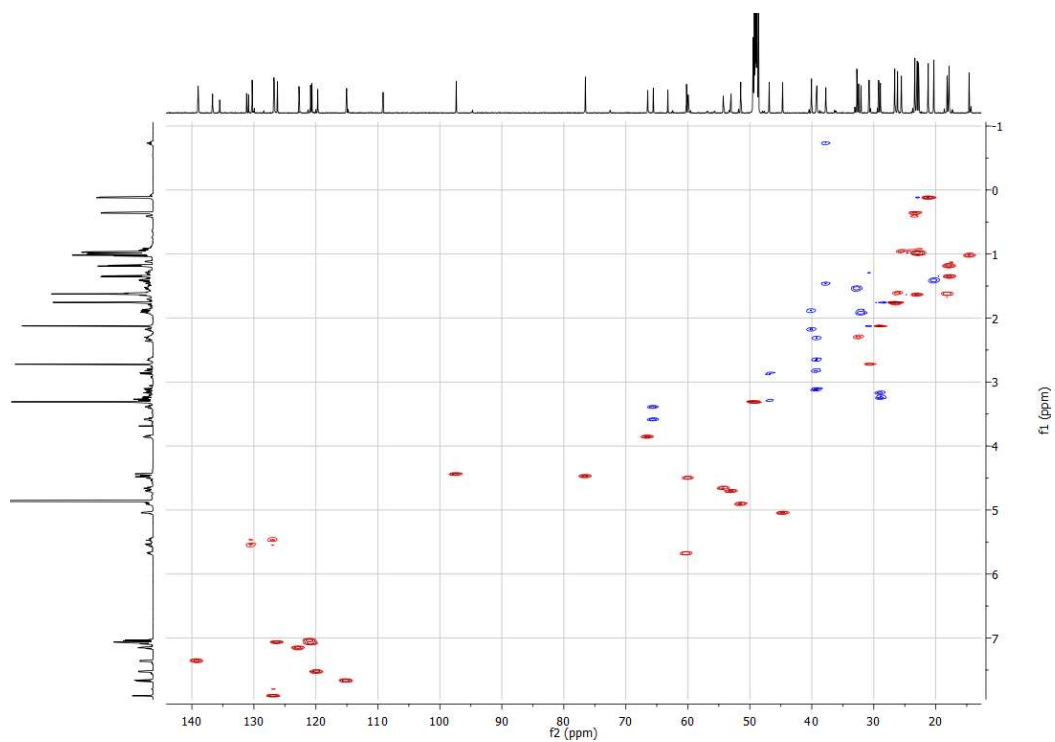

Figure S33. HMBC spectrum of rufomycinSS 1 in CD<sub>3</sub>OD

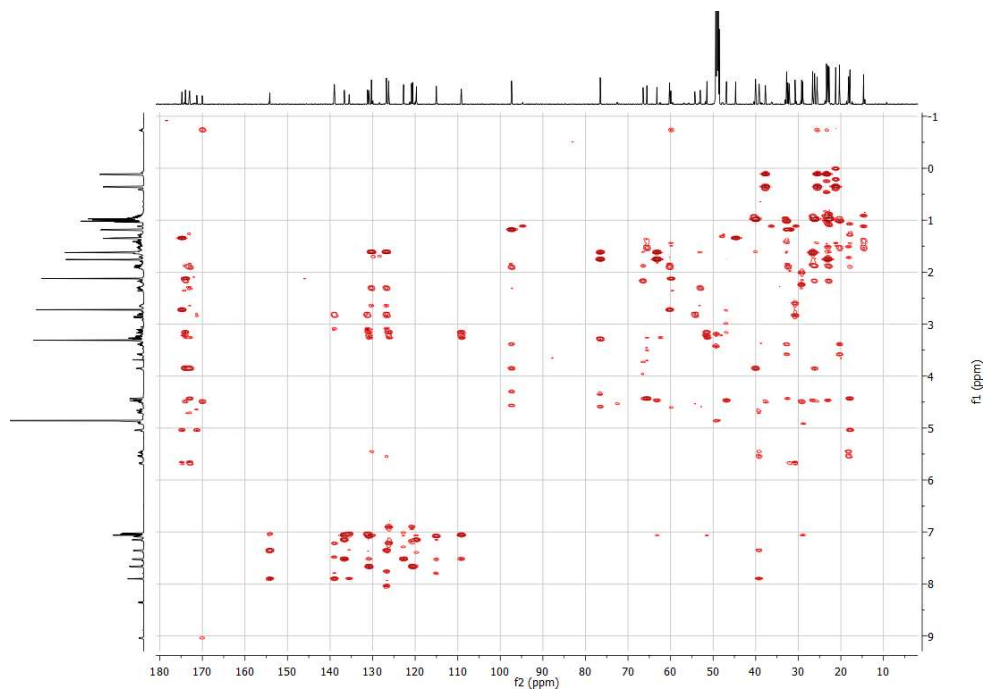

Figure S34. ROESY spectrum of rufomycinSS 1 in CD<sub>3</sub>OD

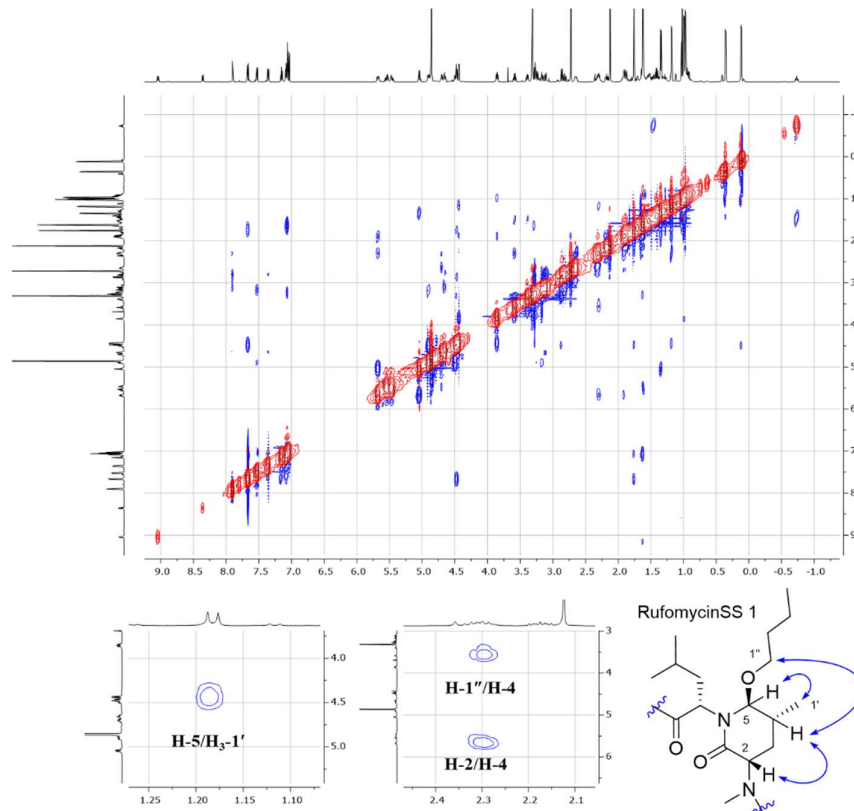

**Figure S35.** HRMS (ESI) spectrum of rufomycinSS 1

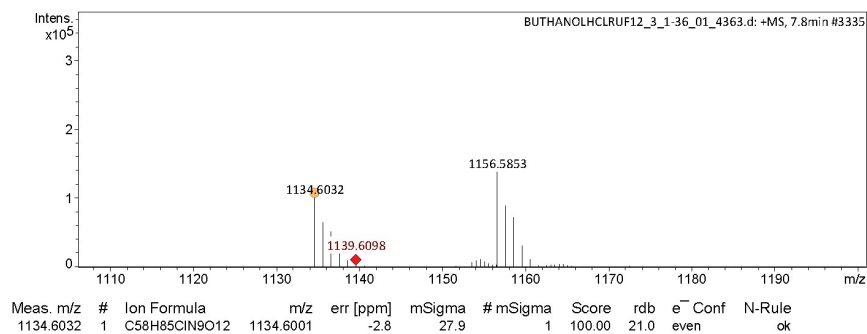

**Figure S36.** <sup>1</sup>H NMR spectrum of rufomycinSS 2 in CD<sub>3</sub>OD at 600 MHz

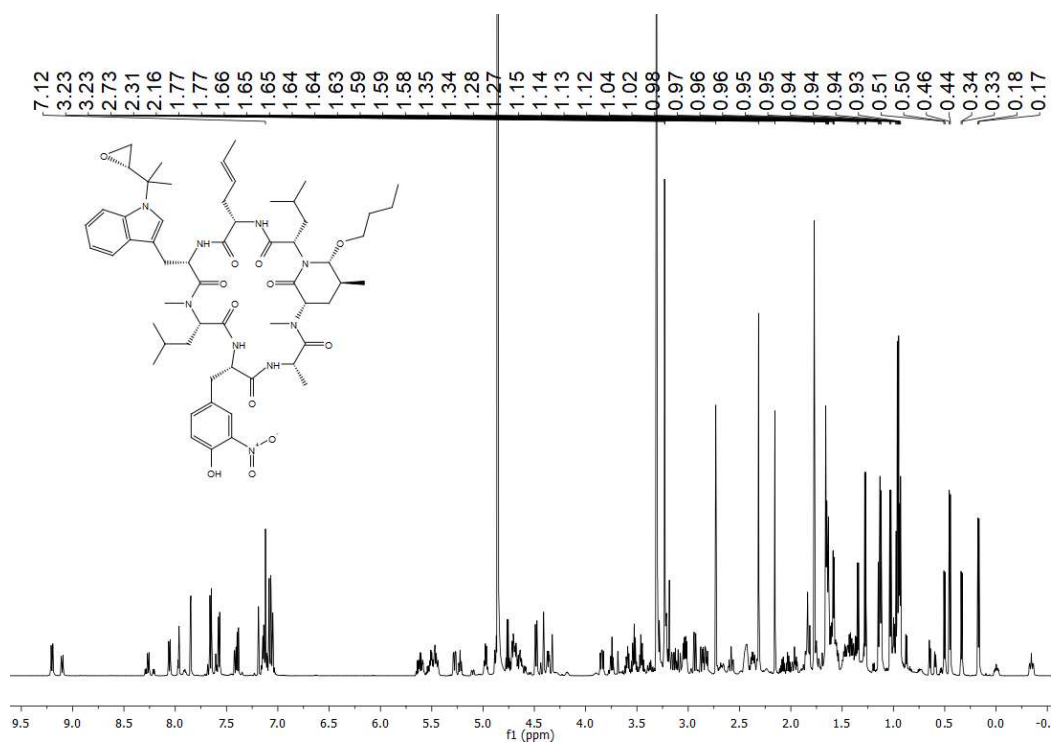

**Figure S37.**  $^{13}\text{C}$  NMR spectrum of rufomycinSS 2 in  $\text{CD}_3\text{OD}$  at 150 MHz

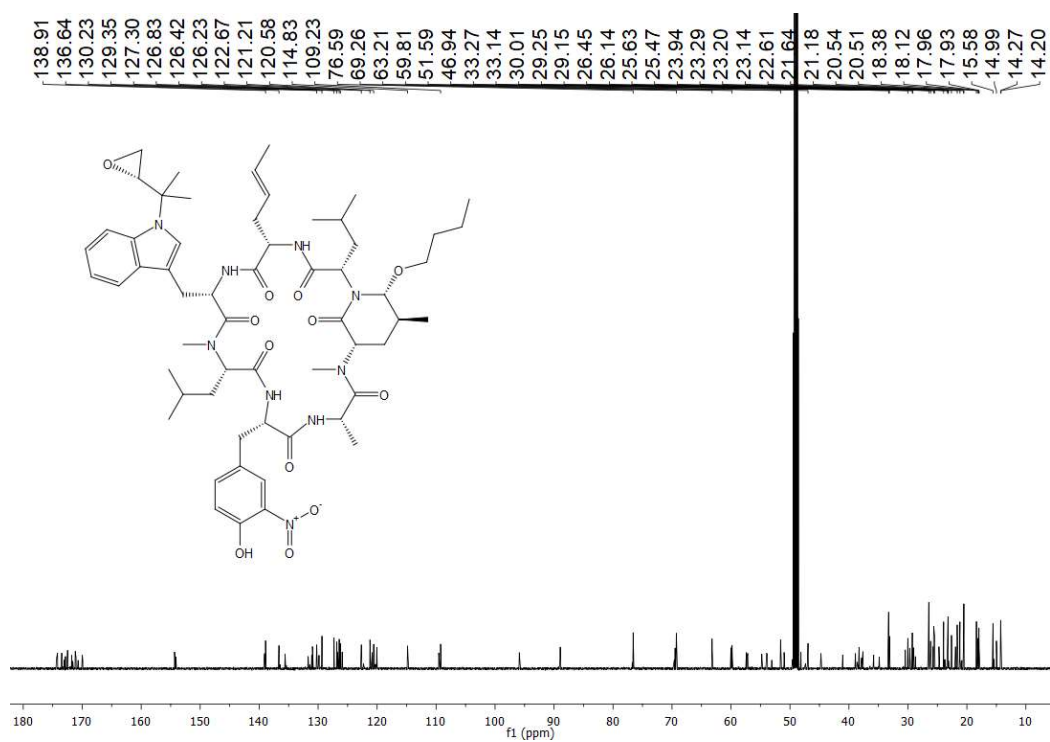

**Figure S38.** TOCSY NMR spectrum of rufomycinSS 2 in  $\text{CD}_3\text{OD}$

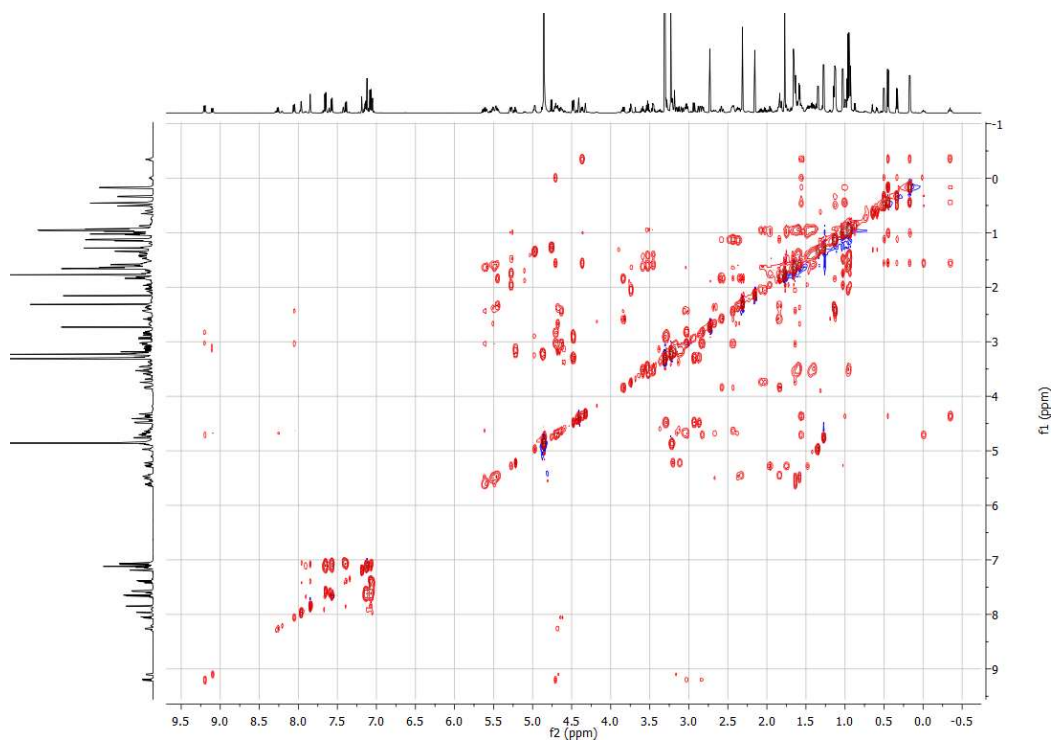

**Figure S39.** HSQC spectrum of rufomycinSS 2 in CD<sub>3</sub>OD

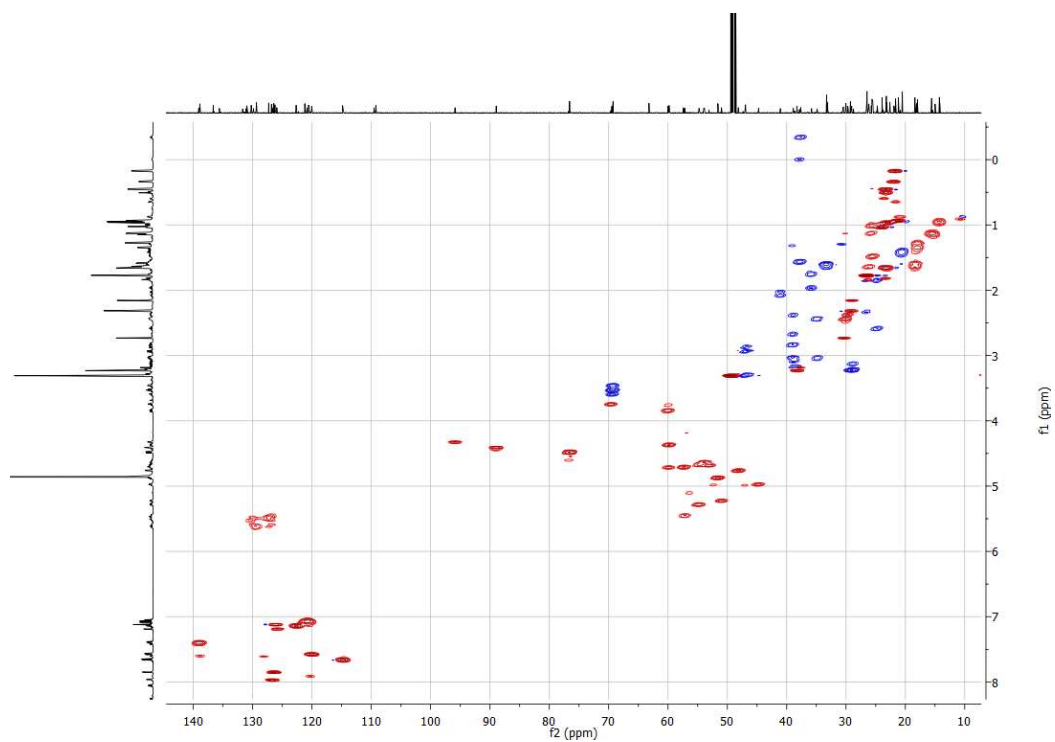

**Figure S40.** HMBC spectrum of rufomycinSS 2 in CD<sub>3</sub>OD

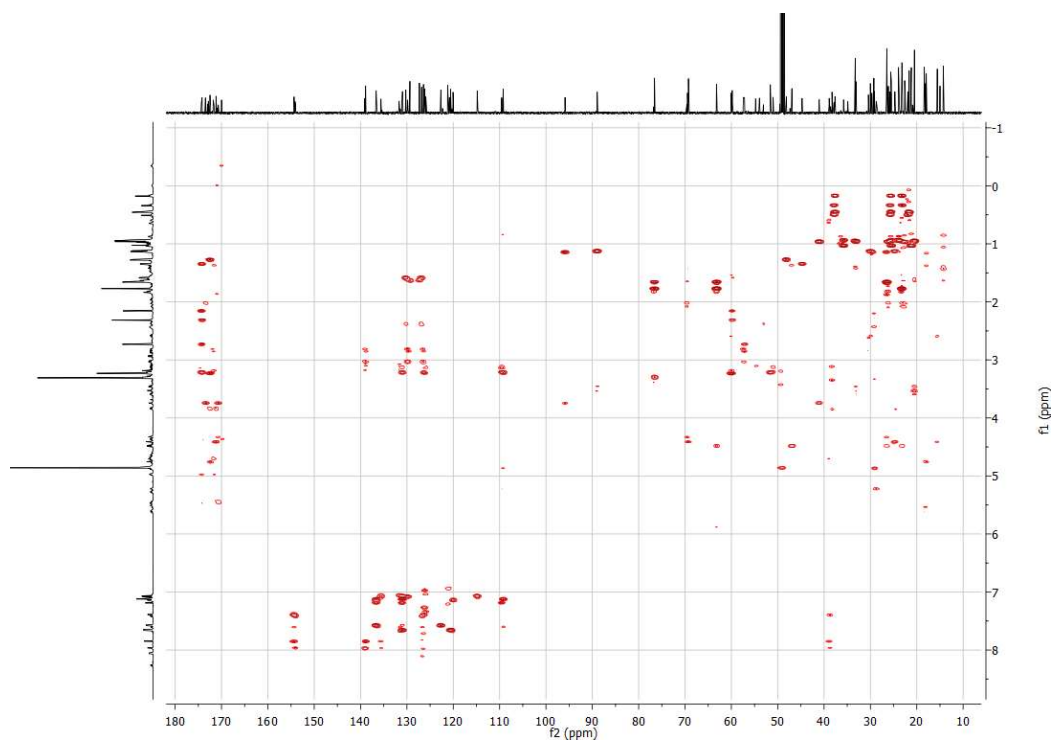



**Figure S41.** ROESY spectrum of rufomycinSS 2 in CD<sub>3</sub>OD

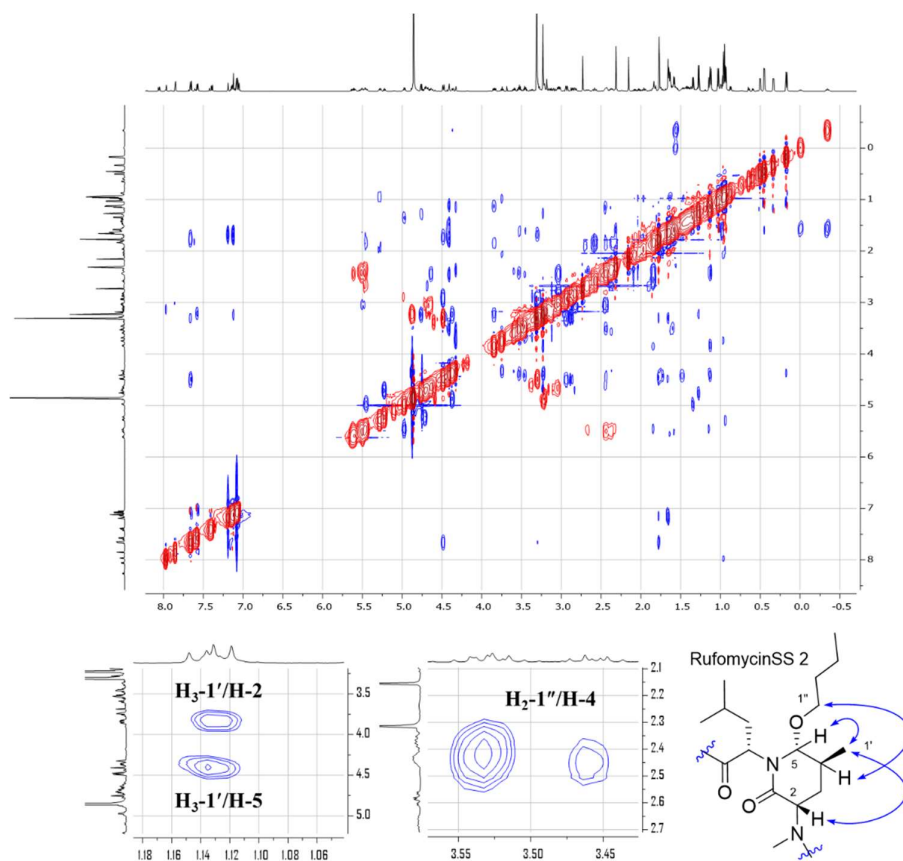

**Figure S42.** HRMS (ESI) spectrum of rufomycinSS 2

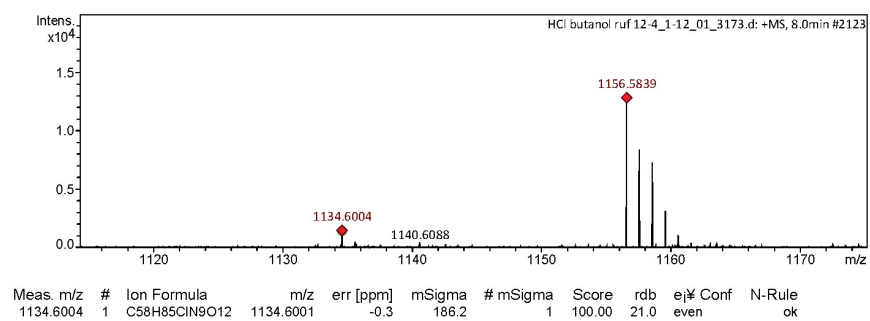

**Figure S43.**  $^1\text{H}$  NMR spectrum of rufomycinSS 3 in  $\text{CD}_3\text{OD}$  at 600 MHz

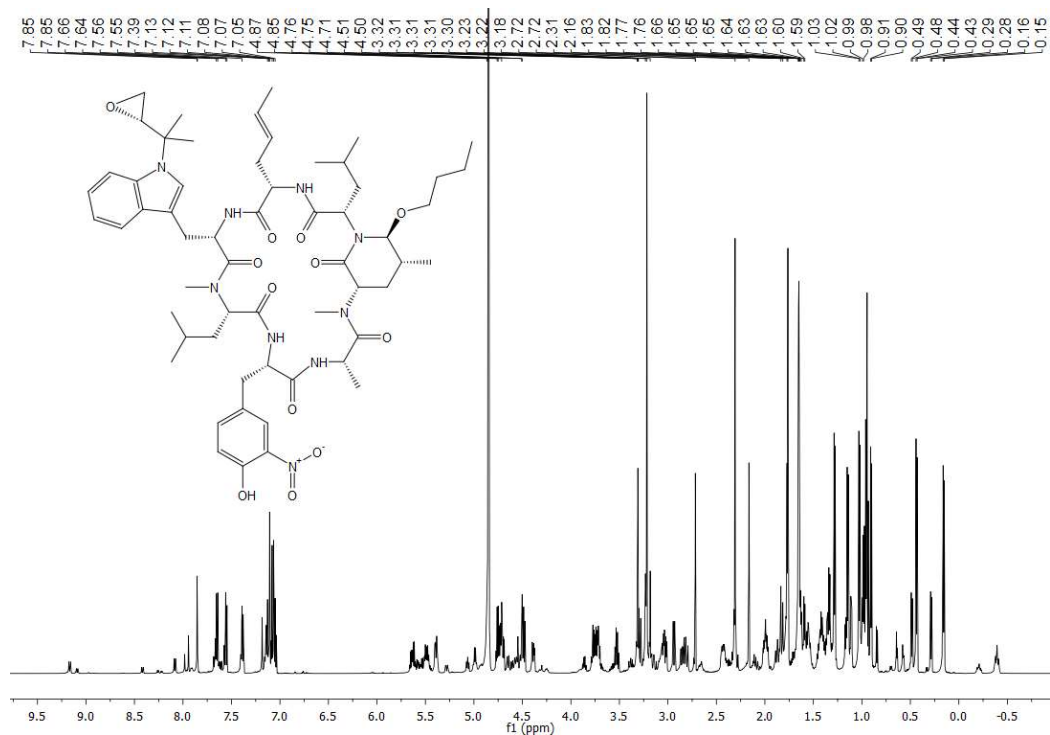

**Figure S44.**  $^{13}\text{C}$  NMR spectrum of rufomycinSS 3 in  $\text{CD}_3\text{OD}$  at 150 MHz

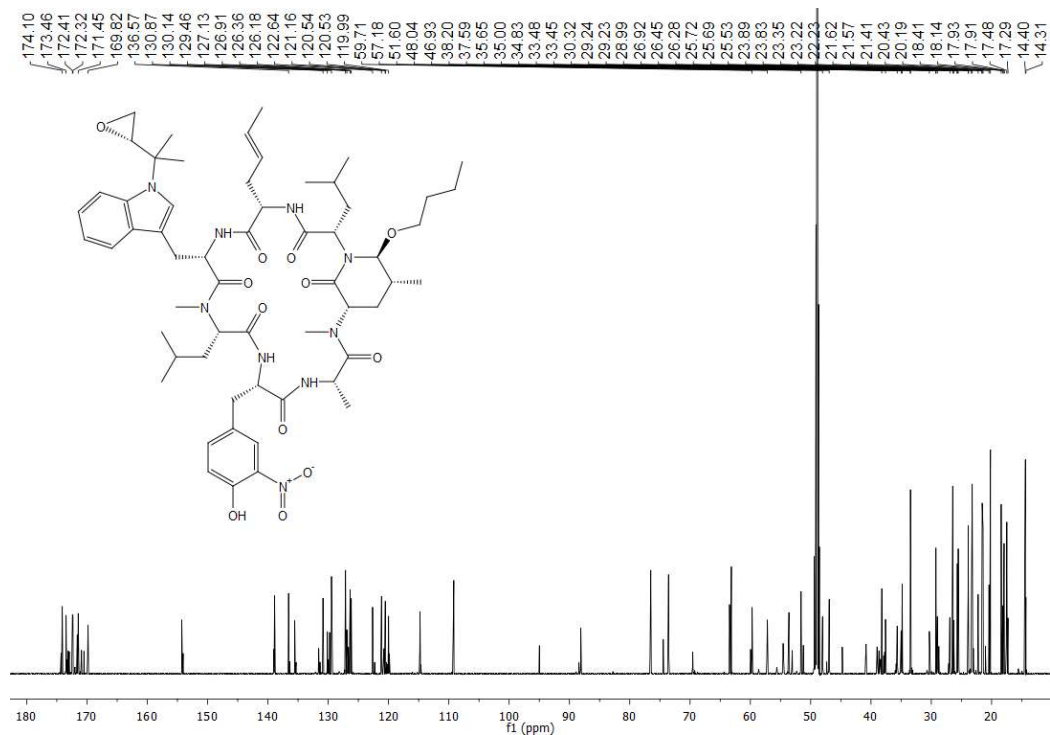

**Figure S45.** TOCSY NMR spectrum of rufomycinSS 3 in CD<sub>3</sub>OD

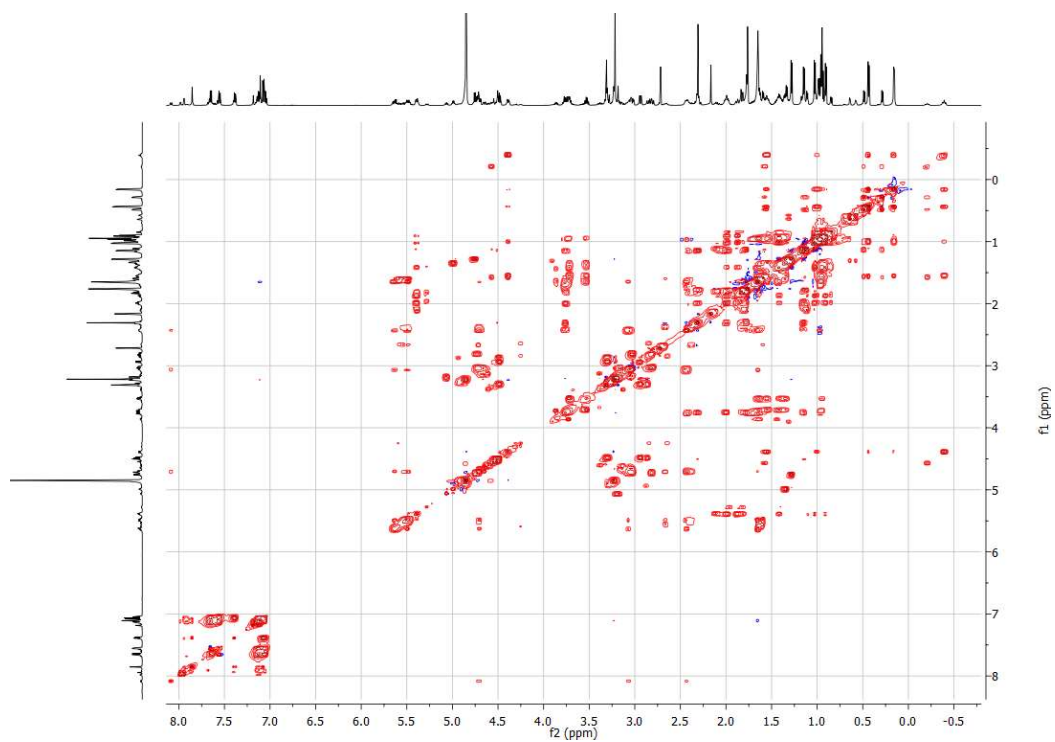

**Figure S46.** HSQC spectrum of rufomycinSS 3 in CD<sub>3</sub>OD

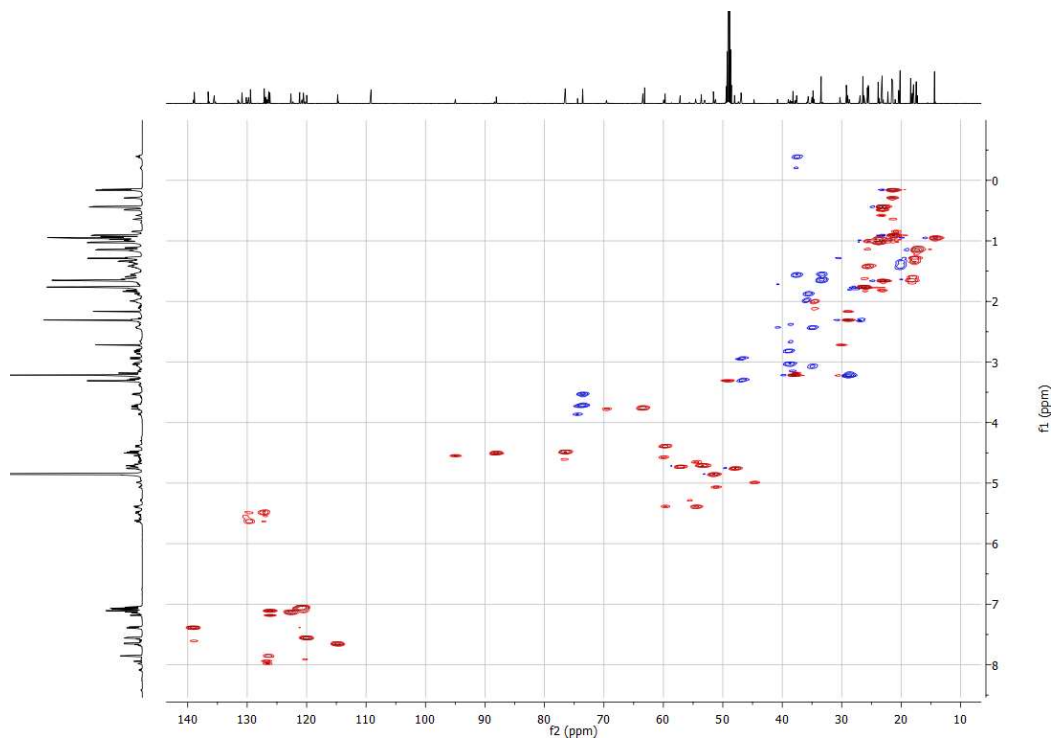

Figure S47. HMBC spectrum of rufomycinSS 3 in CD<sub>3</sub>OD

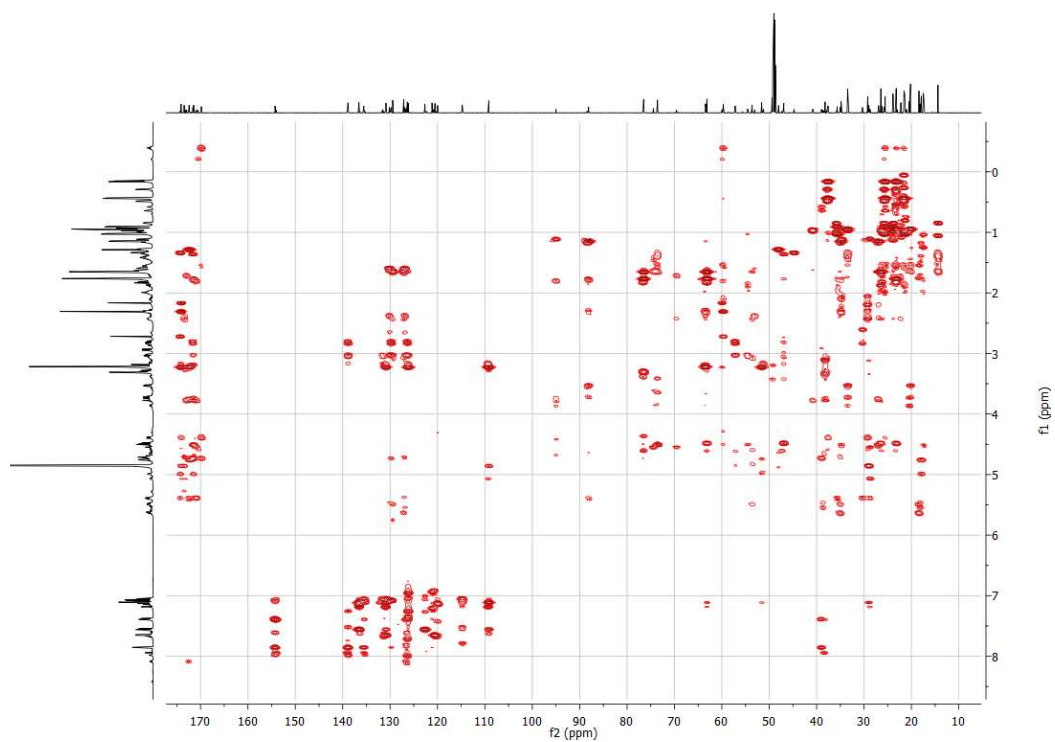

Figure S48. HRMS (ESI) spectrum of rufomycinSS 3

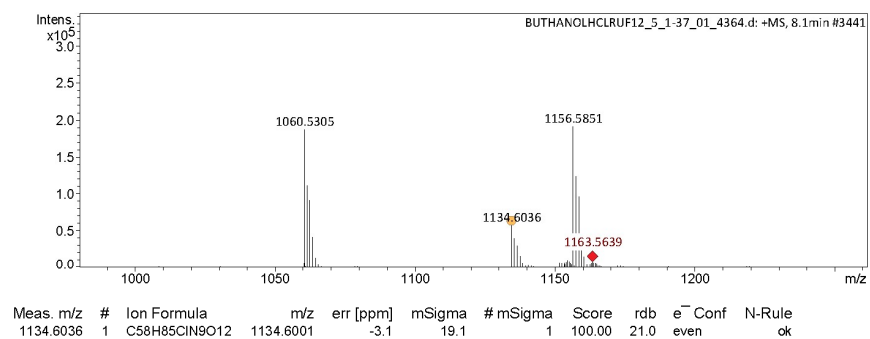

**Figure S49.** ROESY spectrum of rufomycinSS 3 in CD<sub>3</sub>OD

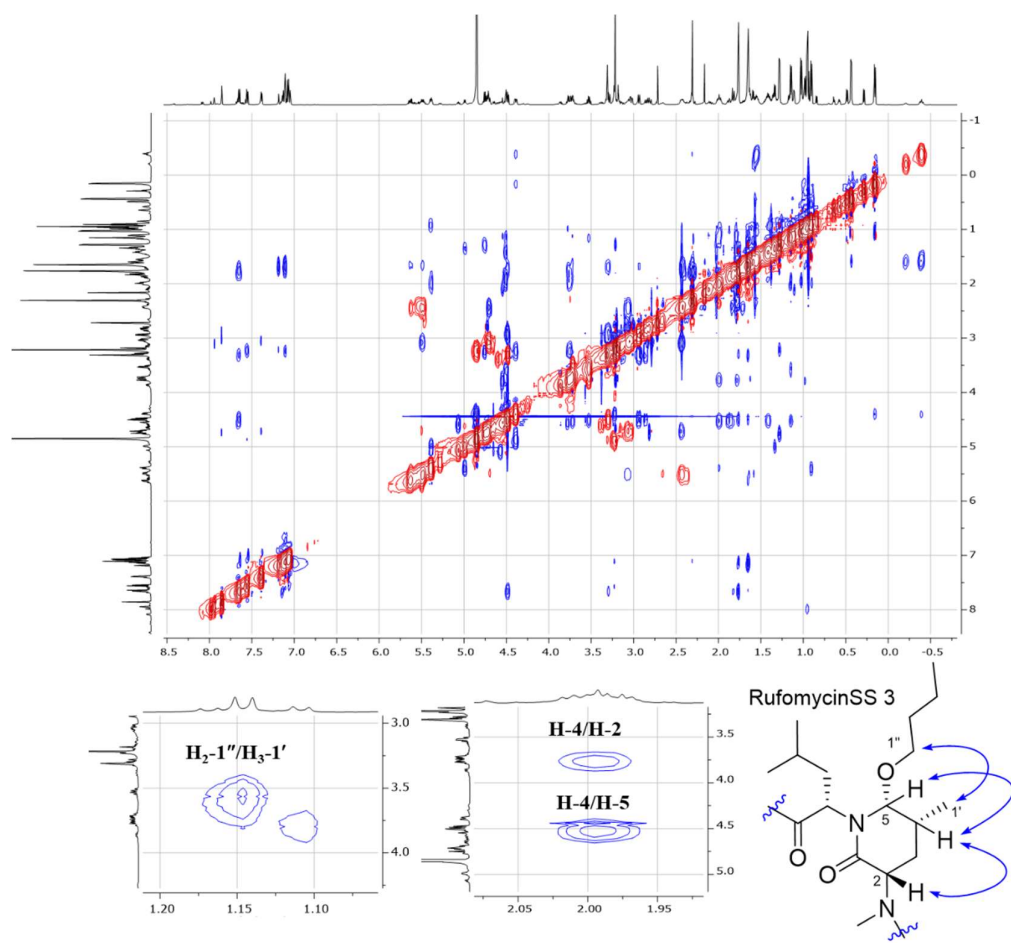

**Figure S50.** Selected HSQC data of rufomycins 6 and 7

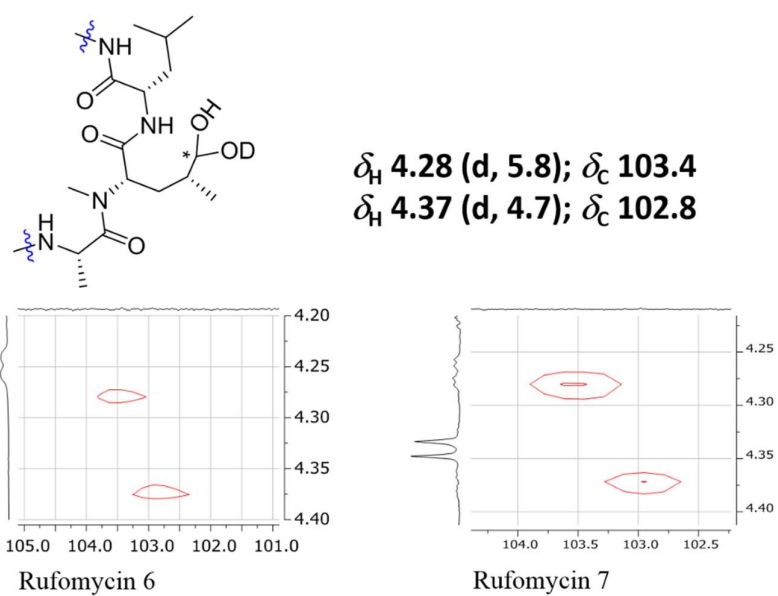

**Figure S51.**  $^1\text{H}$  NMR spectrum of rufomycin 21 in  $\text{CD}_3\text{OD}$  at 400 MHz

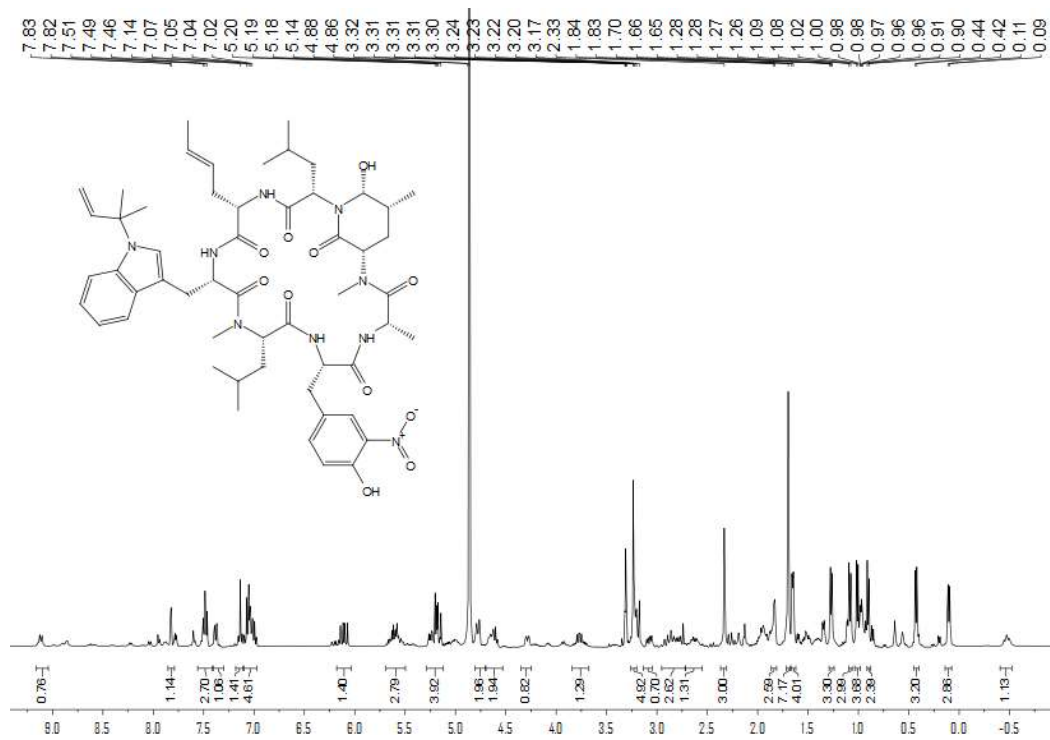

**Figure S52.**  $^{13}\text{C}$  NMR spectrum of rufomycin 21 in  $\text{CD}_3\text{OD}$  at 100 MHz

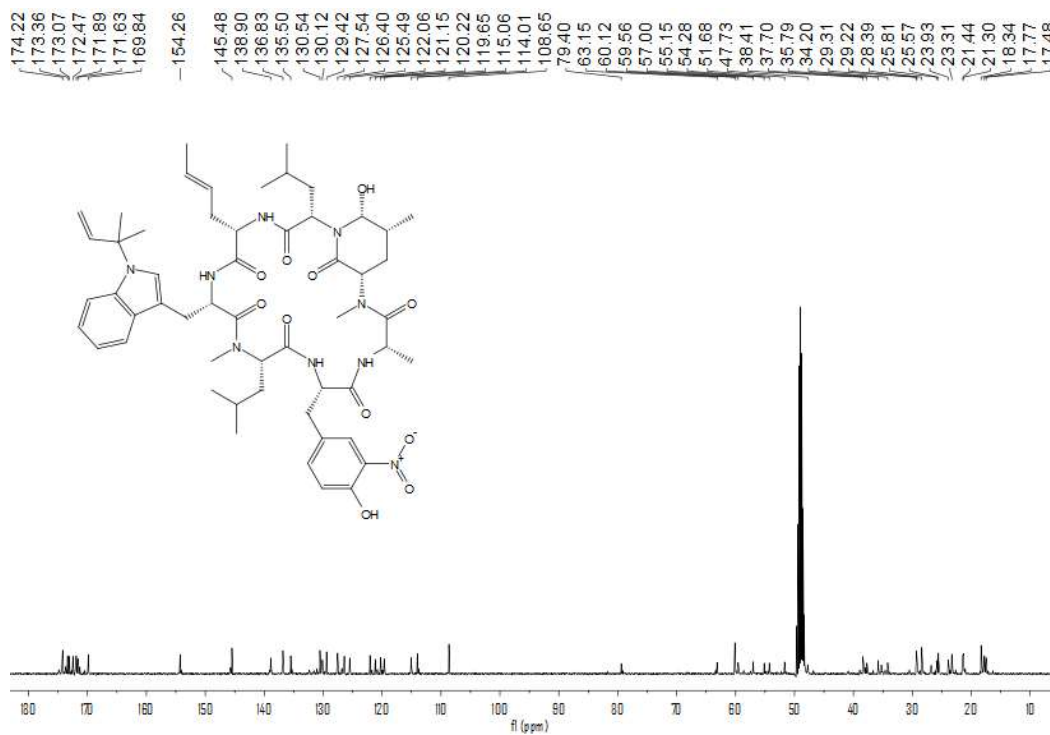

**Figure S53.** TOCSY NMR spectrum of rufomycin 21 in CD<sub>3</sub>OD

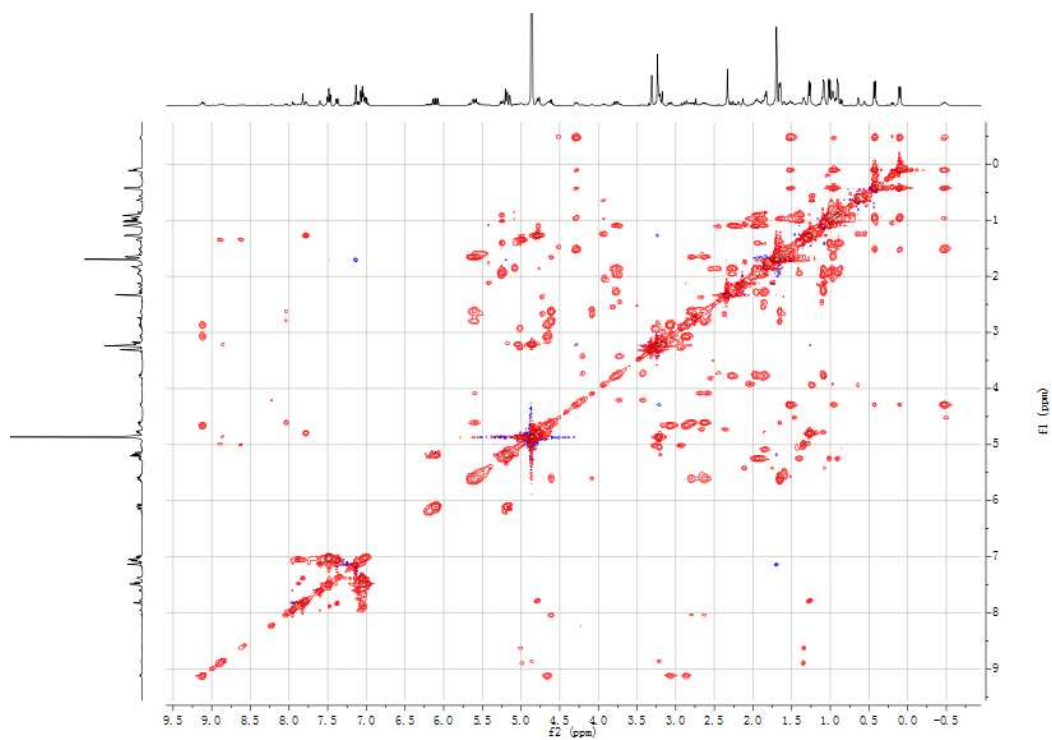

**Figure S54.** HSQC spectrum of rufomycin 21 in CD<sub>3</sub>OD

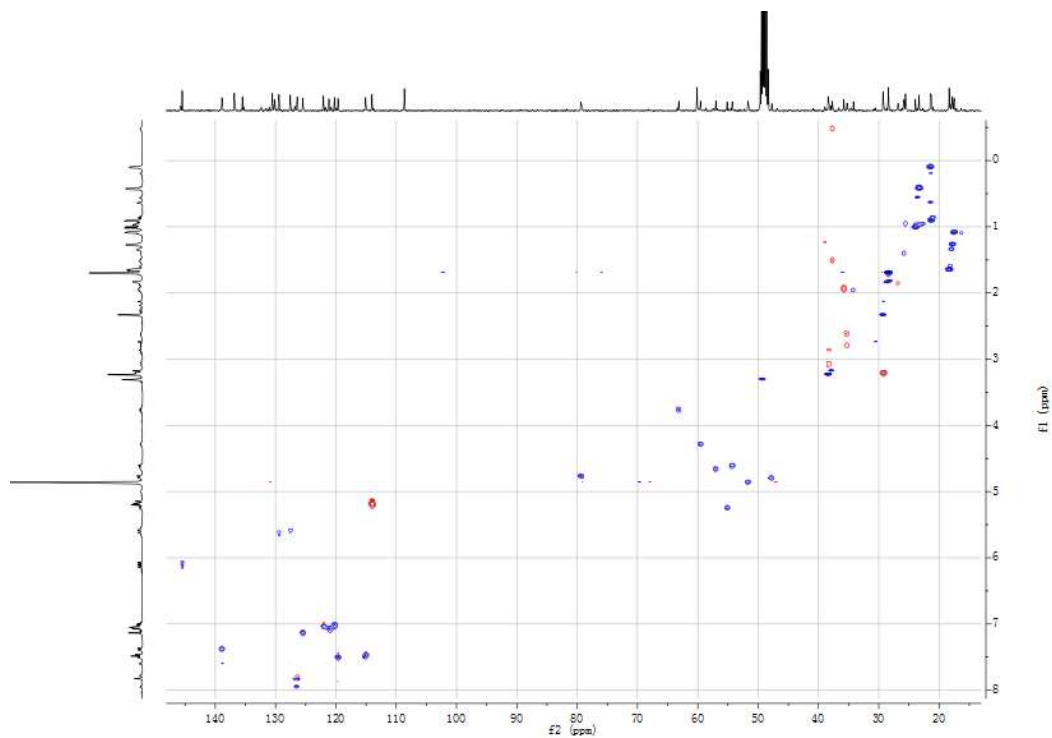

**Figure S55.** HMBC spectrum of rufomycin 21 in CD<sub>3</sub>OD

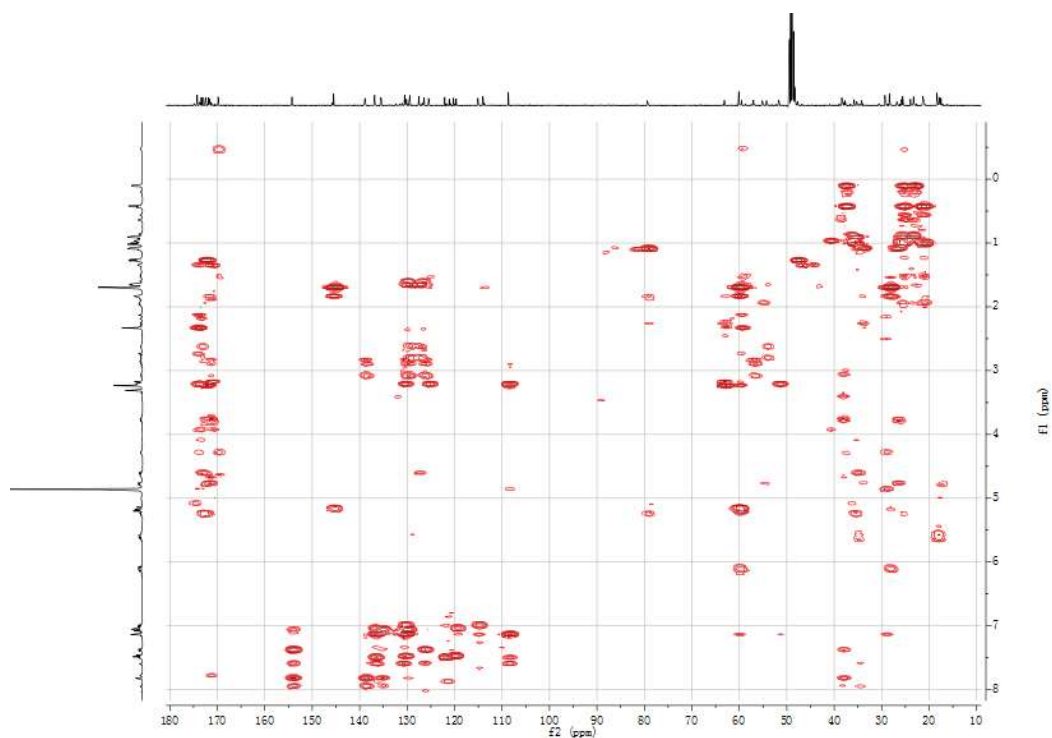

**Figure S56.** HRMS (ESI) spectrum of rufomycin 21

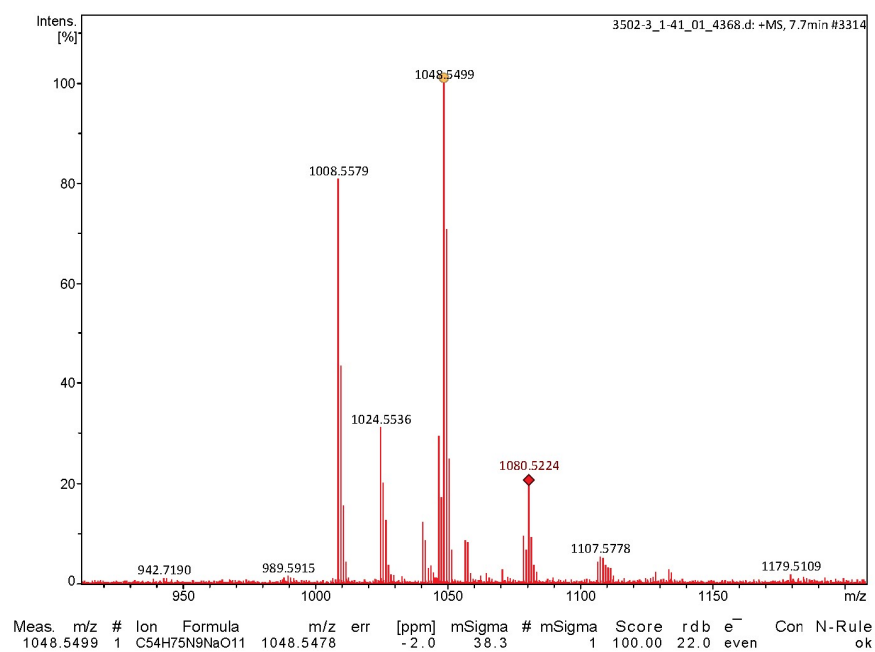



Figure S57. NOESY spectrum of rufomycin 21 in CD<sub>3</sub>OD

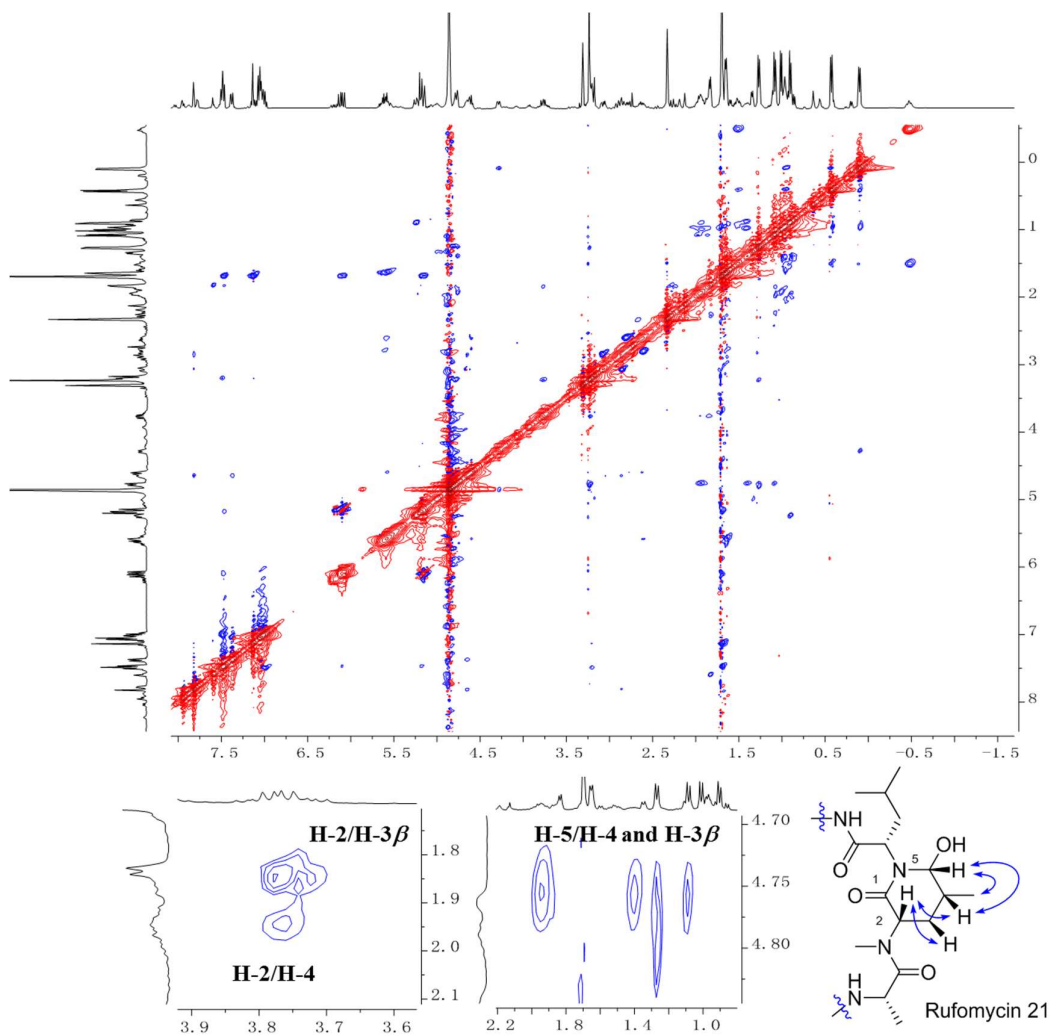

## Chart S2. Structure verification of ilamycin E1 and E2

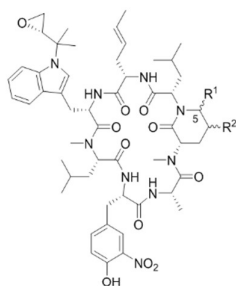

Rufomycin 4  $R^1 = \alpha\text{-OH}$ ;  $R^2 = \beta\text{-CH}_3$   
**CH-5**  $\delta_C$  81.7 and  $\delta_H$  4.76, brd,  $J = 3.7$  Hz

Rufomycin 5  $R^1 = \beta\text{-OH}$ ;  $R^2 = \beta\text{-CH}_3$   
**CH-5**  $\delta_C$  82.5 and  $\delta_H$  4.63, brd,  $J = 2.6$  Hz

Rufomycin 6  $R^1 = \alpha\text{-OH}$ ;  $R^2 = \alpha\text{-CH}_3$   
**CH-5**  $\delta_C$  79.4 and  $\delta_H$  4.76, brd,  $J = 2.1$  Hz

Rufomycin 7  $R^1 = \beta\text{-OH}$ ;  $R^2 = \alpha\text{-CH}_3$   
**CH-5**  $\delta_C$  91.2 and  $\delta_H$  4.34, brd,  $J = 7.9$  Hz

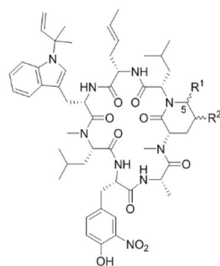

Rufomycin 21=Ilamycin E1 ( $R^1 = \alpha\text{-OH}$ ;  $R^2 = \beta\text{-CH}_3$ )

**CH-5**  $\delta_C$  79.4 and  $\delta_H$  4.76, brd,  $J = 2.6$  Hz  
 To be  $R^1 = \alpha\text{-OH}$ ;  $R^2 = \alpha\text{-CH}_3$

Ilamycin E2 ( $R^1 = \beta\text{-OH}$ ;  $R^2 = \beta\text{-CH}_3$ )

**CH-5**  $\delta_C$  82.5 and  $\delta_H$  4.65, brd,  $J = 1.6$  Hz  
 To be  $R^1 = \beta\text{-OH}$ ;  $R^2 = \beta\text{-CH}_3$

Accordingly, the structure assigned to ilamycin E1 should be revised to show the (4*R*,5*R*,  $\alpha$ -OH,  $\alpha$ -CH<sub>3</sub>, AA5) absolute configuration.

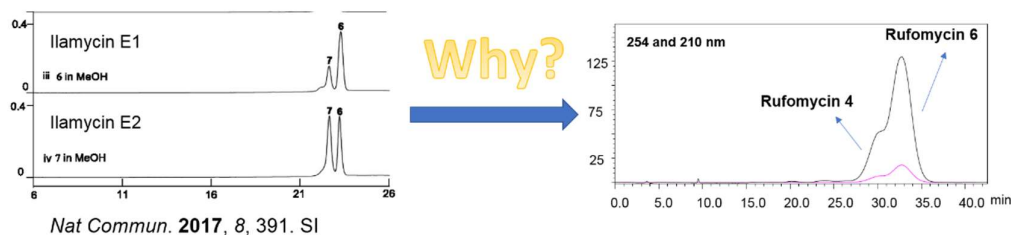

Based on our experiences, rufomycins 4 and 6 are hard to separate. Thus, the “peaks” for ilamycin E1, may not only contain part of the interconverted component from ilamycin E2 (4*R*,5*S*;  $\alpha$ -OH, $\beta$ -CH<sub>3</sub>), but also contain the main component with (4*R*,5*R*;  $\alpha$ -OH,  $\alpha$ -CH<sub>3</sub>)

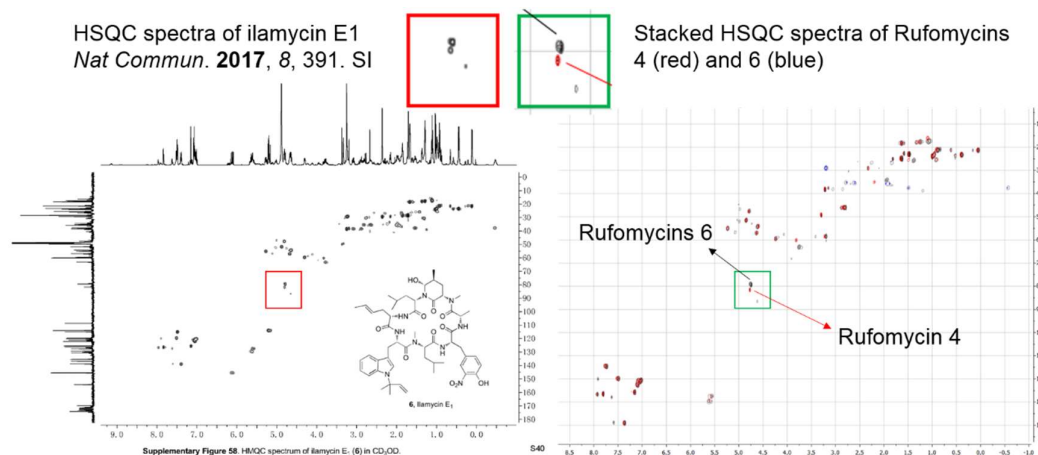

**Figure S58.** RufomycinSS 2 and 3 showed distinct conformers based on the  $^{13}\text{C}$  NMR data

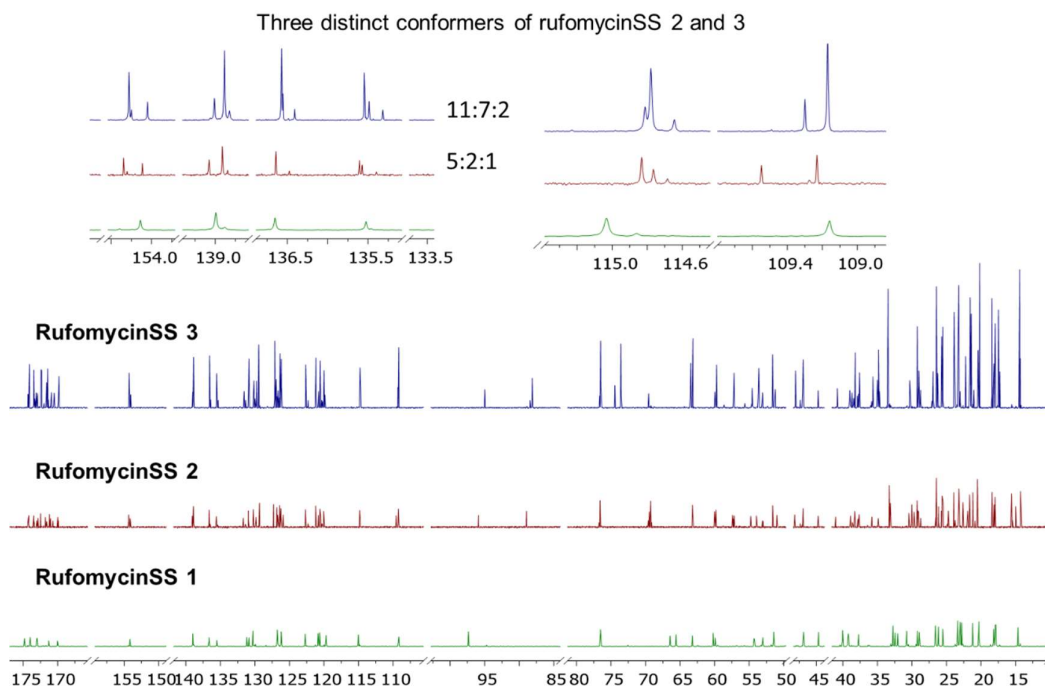

**Figure S59.**  $^{13}\text{C}$  NMR differences ( $\Delta\delta_{\text{C}}$ ) between compound pairs of rufomycins 4/5, 4/6, and 4/7

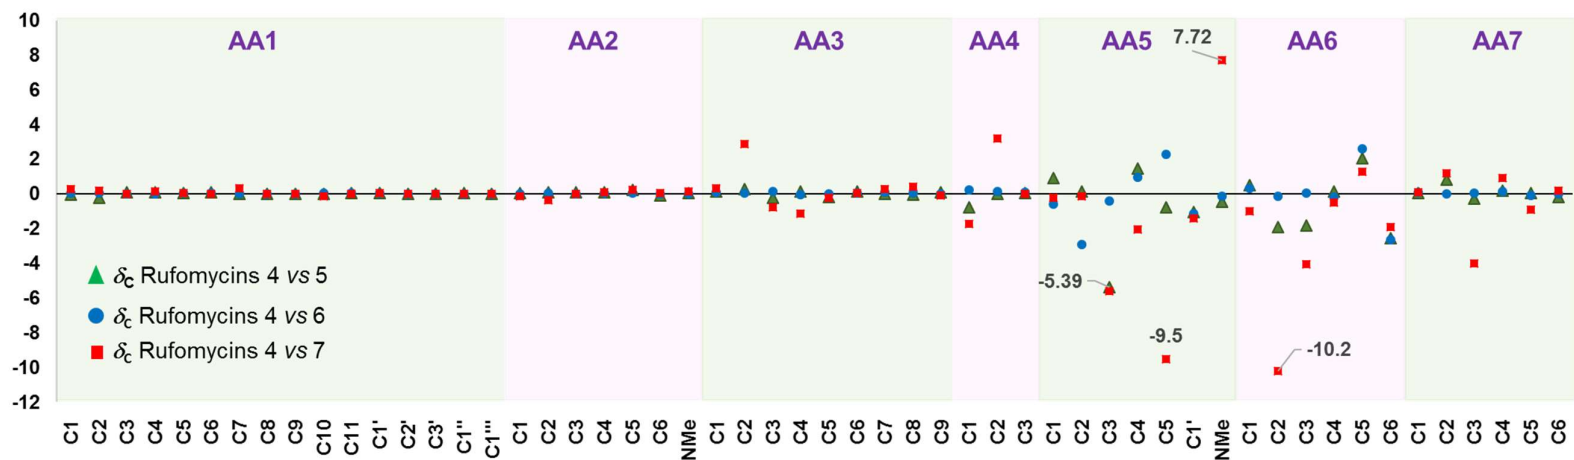

**Figure S60.**  $^1\text{H}$  NMR differences ( $\Delta\delta_{\text{H}}$ ) between compound pairs of rufomycins 4/5, 4/6, and 4/7

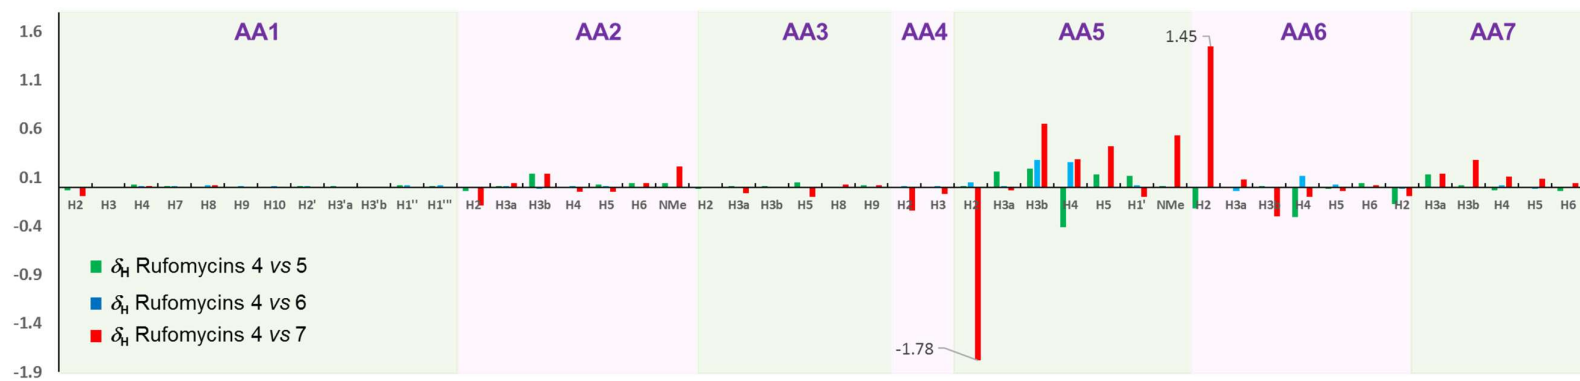

**Figure S61.** Extracted UV data of rufomyicins 4–7

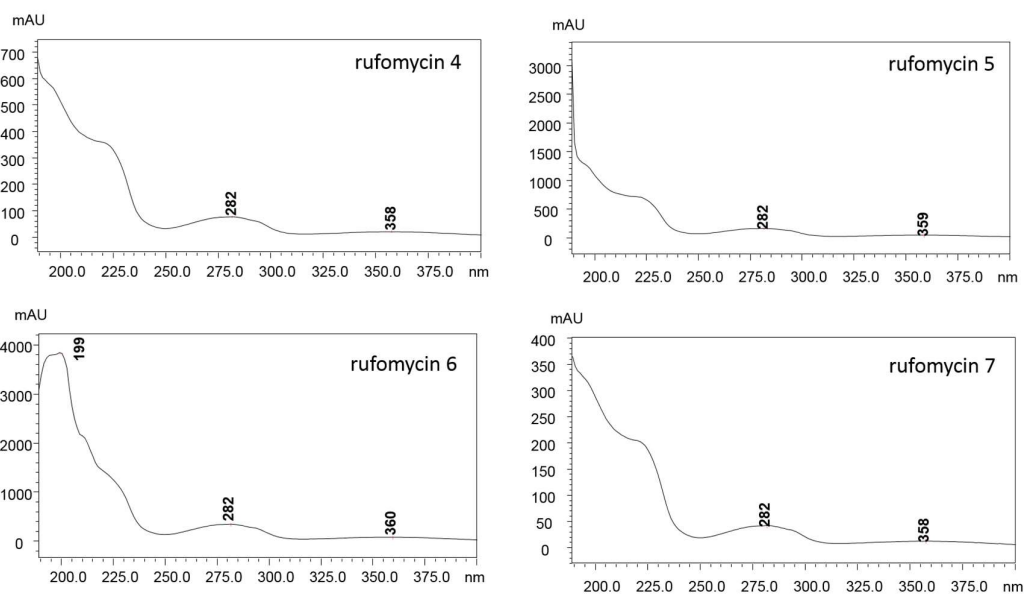

**Figure S62.** UV spectra of rufomycinSS 1–3 in methanol

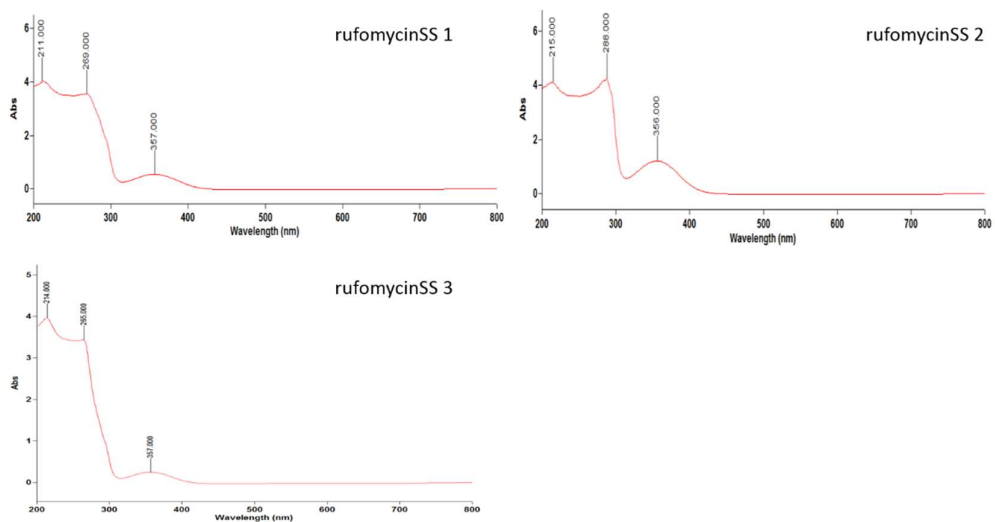

**Figure S63.** IR spectrum of rufomycin 4

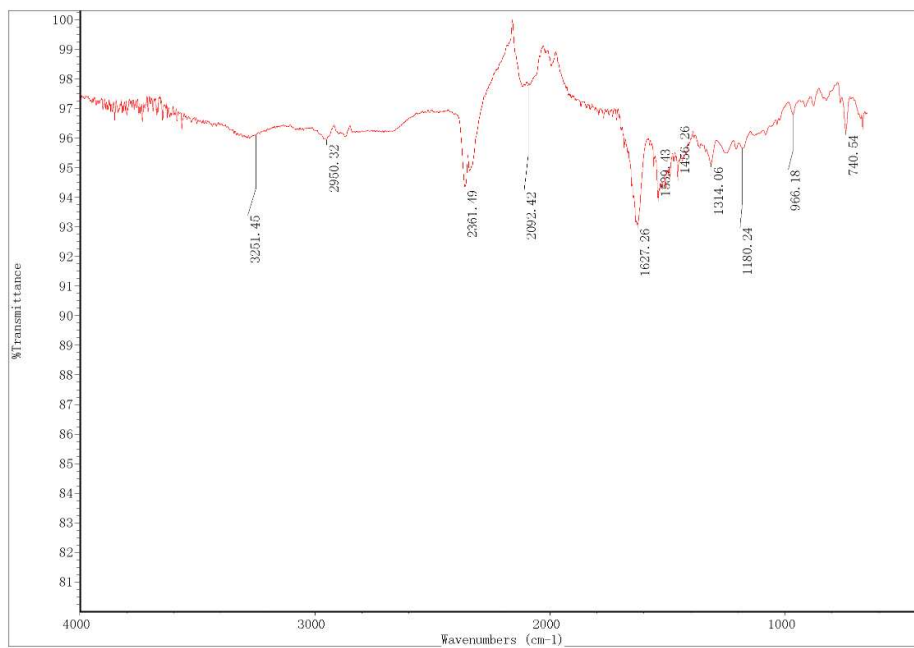

**Figure S64.** IR spectrum of rufomycin 5

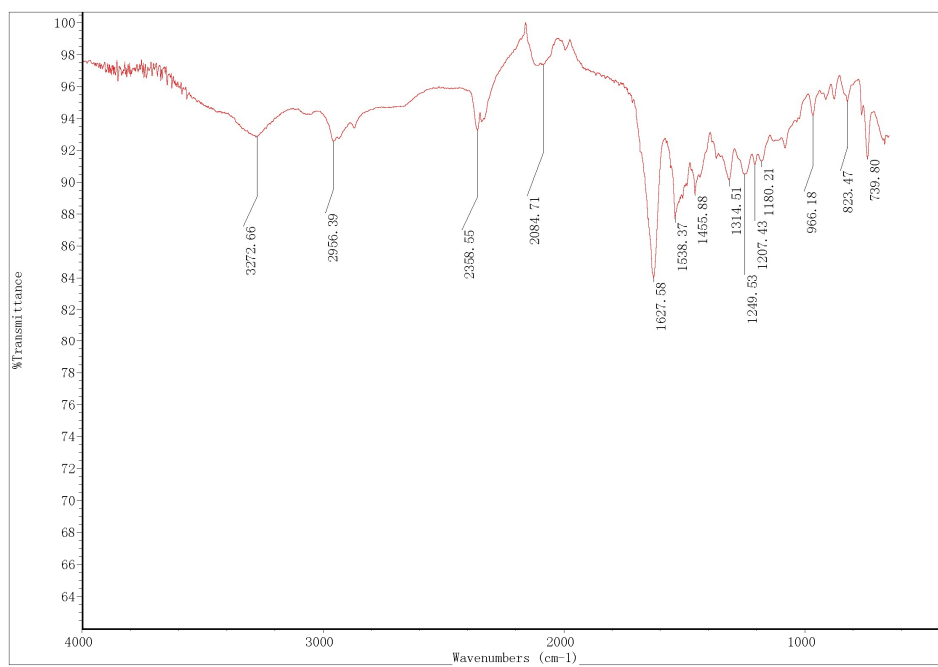

**Figure S65.** IR spectrum of rufomycin 6

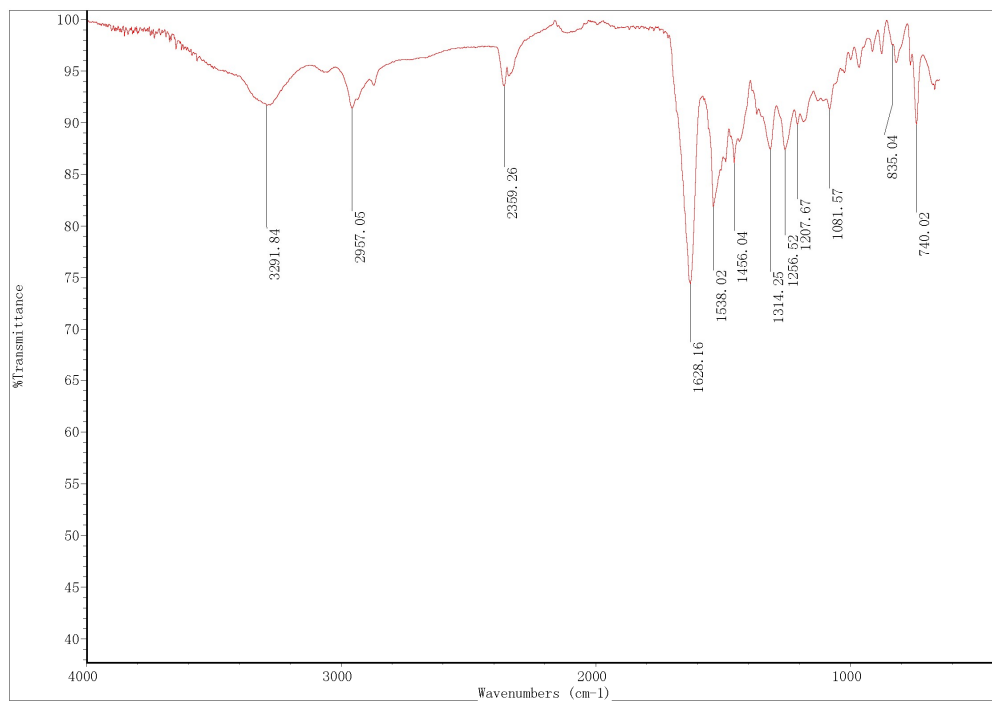

**Figure S66.** IR spectrum of rufomycinSS 1

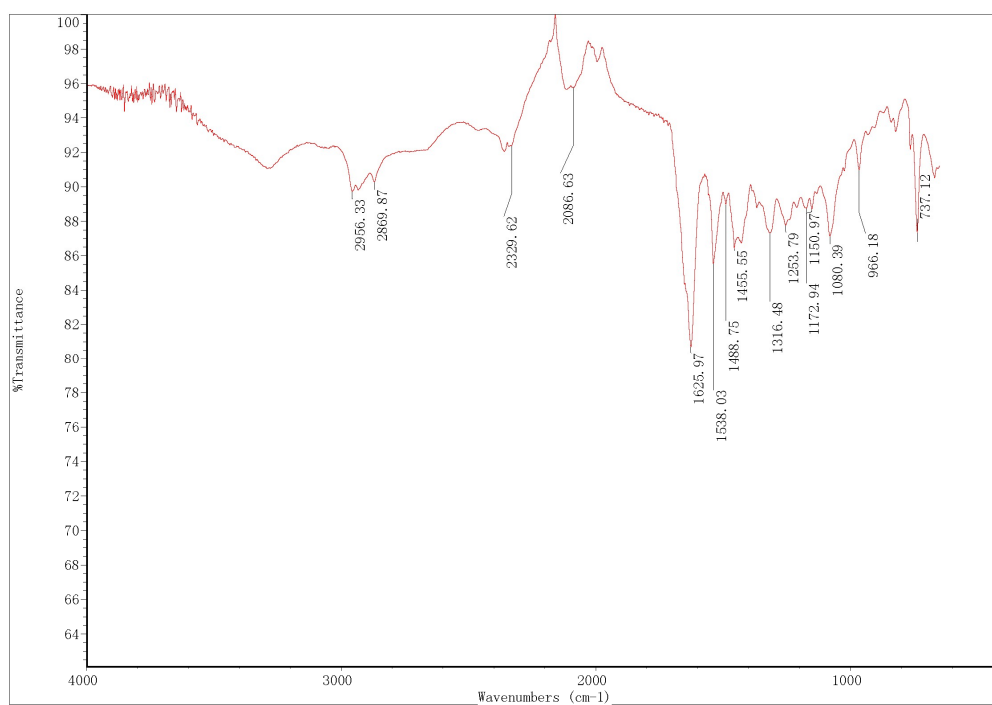



**Figure S67.** IR spectrum of rufomycinSS 2

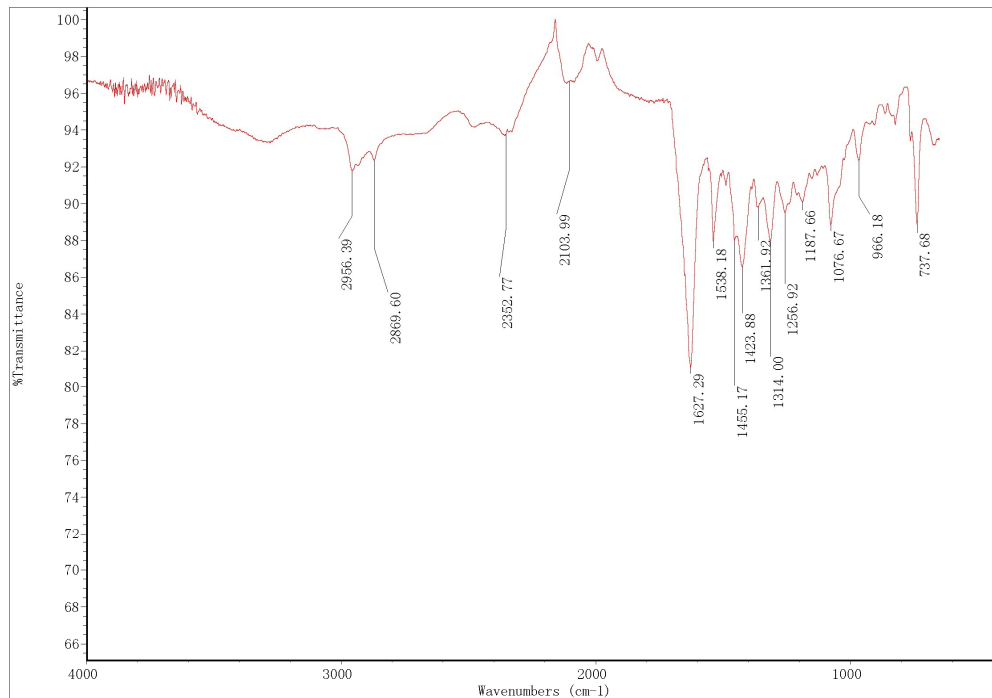

**Figure S68.** IR spectrum of rufomycinSS 3

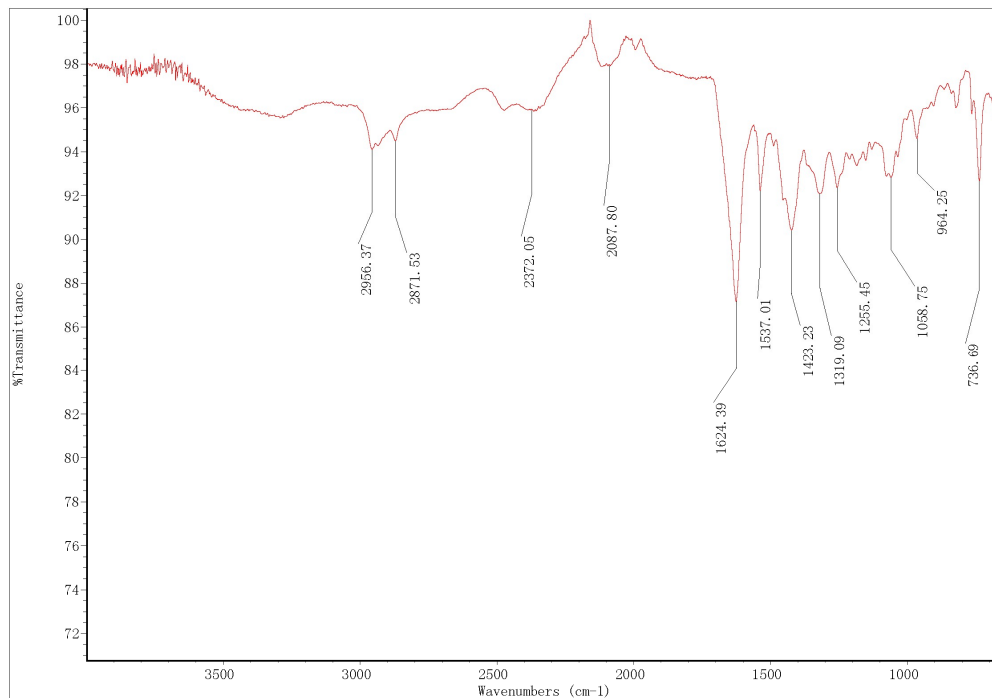

Supplement: NIHMS1775480-supplement-SI__NMR_data.pdf [file NIHMS1775480-supplement-SI__NMR_data.pdf]
